25 accelerates aging-related bone loss. This study identifies Sciadopitysin could reverse  
26 this process by targeting YBX1.

27

## 28 **Abstract**

29 Senescence and change of differentiation direction in bone marrow stromal cells  
30 (BMSCs) are two of the most important causes of age-related bone loss. As an  
31 important post-transcriptional regulatory pathway, alternative splicing (AS) regulates  
32 diversity of gene expression. However, the role of AS in BMSCs during aging  
33 remains poorly defined. Here we identify AS in specific genes disrupt gene expression  
34 pattern and result in age-related debility of BMSCs. We demonstrate the deficiency of  
35 splicing factor Y-box protein 1 (YBX1) result in mis-splicing in genes such as *Fnl*,  
36 *Taz*, *Sirt2* and *Sp7*, further contributing to senescence and shift in differentiation  
37 direction of BMSCs during aging. Deletion or over-expression of YBX1 in BMSCs  
38 accelerate bone loss or stimulate bone formation in mice. Notably, we identify a small  
39 compound sciadopitysin which attenuate the degradation of YBX1 and attenuate bone  
40 loss in old mice. Our study demonstrates elaborately controlled RNA splicing governs  
41 cell fate of BMSCs and provides a potential therapeutic target for age-related  
42 osteoporosis.

43

## 44 **Introduction**

45 Alternative splicing of precursor mRNA (pre-mRNA) is an important  
46 post-transcriptional regulatory pathway of more than 90% of multiexon  
47 protein-coding genes in mammals, enabling cells to generate abundant transcript and  
48 protein diversity from a limited number of genes<sup>1</sup>. Most of human genes undergo  
49 alternative splicing<sup>2</sup> in a variety of physiological and pathological process such as

50 mesenchymal stem cell differentiation, tissue and organ development, aging and  
51 tumorigenesis<sup>3-7</sup>. Dysregulation of pre-mRNA splicing is associated with aging and a  
52 large proportion of age-related changes in alternative splicing are associated with  
53 alternations of the expression of splicing factors<sup>8-10</sup>.

54 Bone marrow stromal cells (BMSCs) have the ability to differentiate into a variety  
55 of cell types including osteoblasts, adipocytes and chondrocytes<sup>11-13</sup>. With age,  
56 BMSCs become more inclined to differentiate into adipocytes rather than osteoblasts,  
57 resulting in bone marrow fat accumulation and bone loss<sup>14-17</sup>. However, the molecular  
58 mechanism which regulates age-associated BMSCs lineage shift remains elusive. In  
59 BMSCs, the expression of genes related to senescence such as *P53/P16*, or key  
60 transcriptional factors related to differentiation such as *Runx2* or *Ppargγ* could be  
61 regulated by alternative splicing<sup>18-21</sup>. Changes of splicing factors and variable of AS  
62 events in BMSCs genes may be critical in BMSCs senescence and fate determination  
63 during aging.

64 Y-box binding protein 1 (YBX1) is a multifunctional protein known to participate  
65 in a wide variety of DNA/RNA-dependent events including DNA reparation and  
66 transcription, pre-mRNA splicing, mRNA stability and translation<sup>22-24</sup>. YBX1 has  
67 been reported to control the expression of pluripotency-related genes in embryonic  
68 stem cells<sup>25</sup>. YBX1 also could regulate multiple biological activities including cell  
69 proliferation, differentiation, senescence, apoptosis, and tumor development<sup>26-29</sup>. It  
70 has been reported that YBX1 restrained cellular senescence by directly binds to the  
71 *p16<sup>INK4A</sup>* promoter and repressed the transcription of *P16<sup>INK4A</sup>*<sup>28</sup>. In the past decades,  
72 as a splicing factor, the role of YBX1 in alternative splicing has been studied<sup>30-34</sup>.  
73 Jayavelu AK et al reported that YBX1 mediated pre-mRNA splicing is the key  
74 mechanism of persistence of JAK2-mutated myeloproliferative neoplasms<sup>33</sup>. Ma, S.

75 et al. demonstrated that YBX1 decreased with aging in six tissues (bone marrow,  
76 brown adipose tissue, white adipose tissue, aorta, skin, liver) and participated in  
77 adipose stem cell maintenance in white adipose tissue<sup>35</sup>. However, whether YBX1  
78 regulates the fate of BMSCs via alternative splicing is unclear.

79 In the present study, we observed altered pre-mRNA splicing and changed gene  
80 expression pattern in BMSCs during aging and we further find that the expression of  
81 splicing factor YBX1 in BMSCs is decreased with aging in mice and human. YBX1  
82 can stimulate osteogenic differentiation and restrain senescence of BMSCs by  
83 regulating a cluster of genes including *Fnl1*, *TAZ*, *Sirt2* and *Sp7* as a splicing factor.  
84 Moreover, we discover a natural small compound, sciadopitysin, which can restrain  
85 the degradation of YBX1 and attenuate age-related bone loss. Our results demonstrate  
86 elaborately controlled RNA splicing regulates differentiation and senescence of  
87 BMSCs and suggest that YBX1 is a potential therapeutic target for age-related  
88 osteoporosis.

89

## 90 **Results**

### 91 **1. Dysregulated pre-mRNA alternative splicing and altered gene expression** 92 **pattern in BMSCs during aging**

93 Aging related decline in bone formation is closely associated with the debility of  
94 BMSCs. BMSCs isolated from 24-month-old mice showed significant higher level of  
95 senescence indicated by  $\beta$ -Gal staining and lower osteogenic differentiation potential  
96 indicated by Alizarin Red staining after osteogenic induction compared with BMSCs  
97 isolated from 2-month-old mice (Figure 1 A-C). Dysregulation of pre-mRNA splicing  
98 directly contribute to cell dysfunction and senescence. To investigate the splicing  
99 events and gene expression pattern in BMSCs during aging, we performed whole

100 transcriptome resequencing and alternative splicing analysis in BMSCs isolated from  
101 2-month-old and 24-month-old mice (Figure 1 D). We evaluated changes in  
102 pre-mRNA splicing by calculating “percentage spliced in”(ΔPSI) values of several  
103 major alternative splicing events with  $\Delta\text{PSI} > 0.1$  and P value  $< 0.05$  (Figure 1 E).  
104 pre-mRNA splicing in BMSCs upon aging showed changes in alternative first exon  
105 event (35.98%), alternative 5' splice site (15.09%), exon skipping (14.76%), intron  
106 retention (13.93%), alternative last exon (11.44%) and alternative 3' splice site  
107 (8.46%) (Figure 1 E). Gene Ontology (GO) analysis showed that those alternative  
108 splicing events involved genes related with osteoblast differentiation and cellular  
109 senescence (Figure 1 F). Meanwhile, the BMSCs isolated from 24-month-old mice  
110 exhibit increased expression of a cluster of senescence and adipogenic differentiation  
111 related genes and decreased expression of a cluster of osteogenic differentiation  
112 related genes with at least a 2-fold change when compared with BMSCs isolated from  
113 2-month-old mice (Figure 1 G). To investigate the potential splicing factor might be  
114 responsible to the altered splicing events in BMSCs during aging, we identified 92  
115 RNA splicing proteins whose expression level changed with at least a 2-fold between  
116 BMSCs isolated from 2-month-old mice and 24-month-old mice, by combine  
117 analyzing RNA sequencing data with RNA binding proteins and RNA splicing  
118 proteins datasets (Figure 1 H, I). These differentially expressed splicing factors form a  
119 regulatory network whose functions are mainly enriched in terms related to various  
120 RNA metabolic processes (Figure 1 J). We further screen out 50 differentially  
121 expressed proteins with function enriched in mRNA splicing or regulation of RNA  
122 splicing (Figure 1 J, K)

123 The changed splicing factors and pre-mRNA altered splicing events might play an  
124 important role in the functional debility of BMSCs during aging.

125 **2. Splicing factor YBX1 regulated the fate decision and senescence of BMSCs**  
126 **and showed decreased expression during aging**

127 Among these changed RNA splicing factors, YBX1, inactivation of which has been  
128 reported inducing apoptosis in mouse and primary human cells and cause regression  
129 of the malignant clones in vivo<sup>33</sup>, displayed significantly lower expression in the  
130 BMSCs isolate from the older mice compared with that from young ones (Figure 1 H).  
131 We confirmed the lower expression level of YBX1 in BMSCs isolated from  
132 24-month-old mice related to 2-month-old mice by immunofluorescence staining  
133 (Figure 2 A-C), western bolt (WB, Figure 2 D) and qPCR (Figure 2 E) analysis. As  
134 YBX1 performs its pre-mRNA splicing function mainly in nucleus, we further  
135 confirmed the lower YBX1 level in nucleus in BMSCs isolated from 24-month-old  
136 mice (Figure 2 D). The YBX1 level was also lower in cultured primary BMSCs from  
137 late passage (Supplemental Figure 1 A-C). Nestin positive cells in bone marrow  
138 represent a subset of messenchymal stem cell<sup>16,36</sup>. Co-immunofluorescence staining  
139 of Nestin and YBX1 on the bone marrow confirmed the lower number of Nestin<sup>+</sup>  
140 BMSCs and YBX1<sup>+</sup> cells in metaphysis area in femur of 24-month-old mice (Figure 2  
141 B, C). Similarly, the YBX1 level in human BMSCs was also negatively correlated  
142 with age (Figure 2 F). These results indicated that slicing factor YBX1 might play  
143 roles in the altered splicing events in BMSCs during aging.

144 Reduced osteogenic differentiation tendency and enhanced adipogenic  
145 differentiation tendency are the characteristics of aging BMSCs. We found that the  
146 RNA and protein level of YBX1 up-regulated during osteogenic induction and  
147 down-regulated during adipogenic induction (Figure 2 G-J). To further investigate the  
148 role of YBX1 in BMSCs differentiation and senescence, we used adenovirus mediated  
149 shRNA to knock down YBX1 in BMSCs and verified the knockdown efficiency by

150 WB tests (Supplemental Figure 1 D). BMSCs with depletion of YBX1 showed lower  
151 osteogenic capacity after osteogenic induction indicated by alizarin red staining  
152 (Figure 2 K, L) and higher adipogenic differentiation ability after adipogenic  
153 induction indicated by Oil Red O staining (Figure 2 M, N). In addition, BMSCs with  
154 depletion of YBX1 had higher percentage of  $\beta$ -Gal positive senescence cells  
155 compared with the control group (Figure 2 O, P). RNA-Seq analysis also showed that  
156 osteogenic differentiation related genes were down-regulated but adipogenic  
157 differentiation and senescence related genes were up-regulated in BMSCs with  
158 depletion of YBX1 in comparison with the control group (Figure 2 Q-T). Taken  
159 together, these results suggested that YBX1 play a role in the regulation of BMSCs  
160 senescence and fate decision.

### 161 **3. Depletion of YBX1 in BMSCs resulted in accelerated bone loss and bone** 162 **marrow fat accumulation**

163 To further investigate the role of YBX1 on the fate decision and senescence of  
164 BMSCs in vivo, we crossed *Prx1-cre* transgenic mice with *YBX1<sup>fllox/fllox</sup>* mice to  
165 specifically knock out YBX1 in BMSCs (*YBX1<sup>Prx1-CKO</sup>*). We confirmed the knockout  
166 efficiency in BMSCs by qRT-PCR analysis (Supplemental Figure 1 E). RNA-Seq  
167 analysis and GO analysis suggested that BMSCs isolated from *YBX1<sup>Prx1-CKO</sup>* mice had  
168 altered genes expression which mainly enriched in osteoblast differentiation, bone  
169 mineralization, bone/skeletal system development and fat cell differentiation in  
170 comparison with the control group (Supplemental Figure 1 F).

171 Micro-computed tomography ( $\mu$ CT) analysis of the distal femur metaphysis  
172 revealed that bone volume was significantly lower in *YBX1<sup>Prx1-CKO</sup>* male mice relative  
173 to their *YBX1<sup>fllox/fllox</sup>* littermates at 3 months and 12 months old (Figure 3 A, B).  
174 Additionally, depletion of YBX1 in BMSCs reduced the trabecular thickness and

175 number, while increased the trabecular separation (Figure 3 C-E). Histochemistry and  
176 immunohistochemical analysis showed that *YBX1<sup>Prx1-CKO</sup>* mice had significantly  
177 higher number of adipocytes in the bone marrow (Figure 3 F, G), but lower number of  
178 osteoblasts on the trabecular bone surfaces (Figure 3 H, I). Calcein double labeling  
179 revealed that *YBX1<sup>Prx1-CKO</sup>* mice had significant lower trabecular bone mineral  
180 apposition rates (MAR) compared with their *YBX1<sup>fllox/fllox</sup>* littermates (Figure 3 J, K).  
181 Constantly, the bone volume, trabecular thickness and number was also significantly  
182 lower while the trabecular separation was significantly higher in *YBX1<sup>Prx1-CKO</sup>* female  
183 mice relative to their *YBX1<sup>fllox/fllox</sup>* littermates at 3 months old (Supplementary Figure 2  
184 A-E). These results suggested that depletion of YBX1 accelerating bone loss and  
185 stimulating bone marrow fat accumulation.

#### 186 **4. Over-expression of YBX1 attenuated fat accumulation and promoted bone** 187 **formation in aged mice**

188 Next, we investigated whether elevated the level of YBX1 could attenuated the  
189 senescence of BMSCs and stimulated its osteogenic differentiation. BMSCs with  
190 over-expression of YBX1 showed enhanced osteogenic differentiation indicated by  
191 Alizarin Red staining (Figure 4 A) and restrained adipogenic differentiation indicated  
192 by Oil Red O staining (Figure 4 B). Over-expression of YBX1 also reduced BMSCs  
193 senescence indicated by  $\beta$ -Gal staining (Figure 4 C). Western blot analysis showed  
194 that BMSCs with over-expression of YBX1 had higher level of osteogenic related  
195 protein SP7, lower level of adipogenic related protein PPAR $\gamma$  and lower level of  
196 senescence related protein P16 (Figure 4 D).

197 To investigate whether recovering of YBX1 expression could further alleviate  
198 aged-associated bone loss in vivo, we constructed AAV serotype 8 with CMV  
199 promoter for gene delivery of YBX1 (rAAV8-YBX1-GFP) to over-express YBX1 in



200 BMCSs. We treated 14-month-old mice with rAAV8-YBX1-GFP by intra-bone  
201 marrow injection. One months after, YBX1 expression level in BMSCs isolated from  
202 mice infected with rAAV8-YBX1-GFP was much higher than that from control mice  
203 (Figure 4 E),  $\mu$ CT analysis showed higher bone volume, trabecular number and lower  
204 trabecular separation in YBX1 over-expression mice compared to the control group  
205 (Figure 4 F-J). rAAV8-YBX1-GFP treated mice had significant lower bone marrow  
206 fat accumulation (Figure 4 K, L) and more osteoblasts on the trabecular bone surfaces  
207 (Figure 4 M, N). These results suggested that recovering of YBX1 expression  
208 restrained age-related bone loss and bone marrow fat accumulation in old mice.

### 209 **5. YBX1 regulated the fate of BMSCs through regulating the splicing of** 210 **pre-mRNAs critical for differentiation and senescence**

211 To further investigate the role of splicing factor YBX1 in BMSCs, we evaluated  
212 changes in pre-mRNA splicing between BMSCs isolated from *YBX1<sup>Prx1-CKO</sup>* mice and  
213 their *YBX1<sup>fllox/fllox</sup>* littermate controls by calculating “percentage spliced in” ( $\Delta$ PSI)  
214 values of major alternative splicing events (Supplementary Figure 3 A, B). There were  
215 234 pre-mRNAs showed altered splicing with  $\Delta$ PSI>0.1 and P value<0.05. The  
216 change in pre-mRNA splicing upon YBX1 deletion was alternative first exon  
217 (45.53%), alternative 5' splice site (17.45%), exon skipping (13.62%), intron  
218 retention (10.21%), alternative 3' splice site (9.79%) and alternative last exon (3.4%)  
219 (Supplementary Figure 3 B). We next performed mass spectrometry (MS) following  
220 immunoprecipitation in BMSCs to identify YBX1 interaction partners  
221 (Supplementary Figure 3 C). Proteomic network analysis showed that YBX1  
222 interacted with a number of proteins related to ribosome, ribosome biogenesis and  
223 spliceosome complex (Supplementary Figure 3 D, E). Protein correlation analysis  
224 indicated that YBX1 and its related protein form a regulatory network whose

225 functions are mainly enriched in various RNA metabolic processes including  
226 spliceosome and ribonucleoprotein complex assembly, snRNA processing, alternative  
227 mRNA splicing and RNA splicing (Supplementary Figure 3 E, F). Among these  
228 YBX1 interaction partners, a cluster of ribonucleoproteins, mRNA splicing factors  
229 and ribosomal proteins were significantly enriched to take part in spliceosome  
230 assembly reaction to form a mature mRNA (Supplementary Figure 3 G, H), which  
231 also indicated the core role of splicing factor YBX1 in pre-mRNA altered splicing  
232 event.

233 To further investigate the mechanism by which splicing factor YBX1 regulating the  
234 differentiation and senescence of BMSCs, we identified genome-wide targets of  
235 YBX1 in BMSCs by anti-YBX1 ultraviolet crosslinking immunoprecipitation (CLIP)  
236 analysis using BMSCs cell line (Figure 5 A). CLIP analysis identified 7890  
237 YBX1-binding sites and approximately 51.69% of them were distributed in exons  
238 (Figure 5 B), with obvious preferential occupancy of CLIP sequence (Figure 5 C). By  
239 combine RNA sequencing and anti-YBX1 CLIP analysis, we identified 66  
240 pre-mRNAs in BMSCs with YBX1-binding sites showed alternative splicing upon  
241 YBX1 deletion (Figure 5 D). Among those mRNAs, BMSCs osteogenesis related  
242 genes *Fn1* and *Sp7*, BMSCs senescence related gene *Sirt2*, and BMSCs differentiation  
243 transcriptional modulate gene *Taz*<sup>37</sup>, were identified as direct YBX1-mRNA binding  
244 targets and went through mis-splicing, including alternative first exon of *Fn1*, exon  
245 skipping of *Sirt2*, *Sp7* and *Taz* upon YBX1 deletion (Figure 5 E-H). We constructed an  
246 RNA map for YBX1-dependent splicing regulation and found that repression and  
247 activation related binding occurred at almost completely different sites (Figure 5 I).  
248 Semi-quantitative PCR validated the exon skipping of *Sirt2*, *Sp7* and *Taz* in BMSCs  
249 isolated from 24-month-old mice and *YBX1*<sup>*Prx1*-CKO</sup> mice (Figure 5 J-M). To further

250 investigated whether those mis-splicing would affect BMSCs differentiation, we  
251 transfected the different mRNA isoforms of *Taz*, *Sp7* or *Sirt2* into BMSCs which  
252 underwent osteogenic or adipogenic induction. The long isoform of *Sp7* mRNA  
253 (without skipping of e2) had better promoting effect on osteogenic differentiation in  
254 BMSCs (Figure 5 O), the long isoform of *Taz* mRNA (without skipping of e9) had  
255 better promoting effect on osteogenic differentiation and better suppression effect on  
256 adipogenic differentiation in BMSCs (Figure 5 N, P) and the long isoform of *Sirt2*  
257 mRNA (without skipping of e2) had better suppression effect on senescence of  
258 BMSCs (Figure 5 Q).

259 In order to evaluate whether those altered splicing events in pre-mRNA would  
260 result in a variation in protein level, we performed WB test and demonstrated a  
261 decreased expression in FN1, TAZ, SIRT2 and SP7, which pre-mRNA had direct  
262 YBX1-mRNA binding target and went through mis-splicing, in BMSCs isolated from  
263 *YBX1<sup>Prx1-CKO</sup>* mice (Figure 5 R). TAZ was reported to form a transcriptional complex  
264 with RUNX2 that drives osteogenic differentiation of BMSCs, coordinately represses  
265 adipocyte differentiation in a transcriptional repressor of PPAR $\gamma$ <sup>14,37</sup>. Our previous  
266 research suggested that YBX1 could directly bind to the promoter and repress the  
267 expression of P16 in hypothalamic neural stem cells<sup>27</sup>. We also detected a decreased  
268 expression in RUNX2 and increased expression level of P16 and PPAR $\gamma$  in BMSCs  
269 isolated from *YBX1<sup>Prx1-CKO</sup>* mice (Figure 5 R).

270 In nucleus, YBX1 mainly performs its pre-mRNA splicing function, meanwhile  
271 YBX1 also could bind to the 3'UTR region of mRNA to maintain its stability in  
272 cytoplasm<sup>26</sup>. We also detected many binding sites of YBX1 in 3'UTR region of  
273 mRNA in BMSCs (Figure 5 B). The protein level of YBX1 was also lower in  
274 cytoplasm of BMSCs isolated from older mice and in cultured primary BMSCs from

275 later passage (Figure 2 D and Supplemental Figure 1 B). By combine RNA  
276 sequencing and anti-YBX1 CLIP analysis, we identified 89 mRNAs in BMSCs with  
277 YBX1-binding sites on 3' UTR region showed altered expression upon YBX1 deletion  
278 (Supplemental Figure 4 A, B). Among those mRNAs, senescence related gene *Nrp2*,  
279 osteogenesis related genes including *Bgn*, *Colla2* and *Thbs1* with its downstream FAK  
280 signaling, showed decreased expression upon YBX1 deletion (Supplemental Figure 4  
281 C-E),

282 As an RNA binding protein, YBX1 also could bind to the promoter regions of  
283 genes and regulated their expression<sup>28,38</sup>. To investigate whether YBX1 regulated  
284 those senescence and osteogenesis genes of BMSCs at transcriptional level, we  
285 performed YBX1 chromatin immunoprecipitation sequencing (ChIP-seq) and found  
286 that only 2.69% peaks located at the promoter region (Supplemental Figure 5 A) and  
287 there was no significant difference between the enrichment of YBX1 and input at the  
288 transcription start sites TSSs (Supplemental Figure 5 B). Additionally, there was no  
289 significant binding of YBX1 to promoter region of *Bgn*, *Colla2*, *Nrp2*, *Thbs1*, *Fn1*, *Taz*,  
290 *Sirt2*, and *Sp7* genes (Supplemental Figure 5 C, D).

291 Taken together, these results suggested that YBX1 regulated the expression level of  
292 osteogenic differentiation, adipogenic differentiation and senescence related genes in  
293 BMSCs by controlling pre-mRNA alternative splicing and mRNA stability.

## 294 **6. Sciadopitysin bind to and inhibited ubiquitin degradation of YBX1**

295 To search the potential therapeutic strategy to restrain the age-related debility of  
296 BMSCs by targeting YBX1, we performed molecular docking to screen the natural  
297 small molecular compounds that interacted with mouse YBX1 as previously reported  
298<sup>27</sup>. We chose 9 top-ranked small molecules which are related to anti-oxidation,  
299 anti-inflammation, anti-aging and bone metabolism (Figure 6 A). Among these

300 candidates, 5 compounds including theaflavin-3-gallate, eriocitrin, sciadopitysin,  
301 isoginkgetin and bilobetin showed no adverse effect on BMSCs proliferation  
302 evaluated by CCK8 assay (Figure 6 B) and all of these 5 compounds had no effects on  
303 the transcription of *YBX1* (Figure 6 C). Only sciadopitysin and theaflavin-3-gallate  
304 could promote osteogenic differentiation, inhibit adipogenic differentiation and  
305 attenuate senescence of BMSCs, between them, sciadopitysin showed better effects  
306 (Figure 6 D-G). So, we choose sciadopitysin for further study. The structure and  
307 binding mode of sciadopitysin and YBX1 showed that sciadopitysin could enter into  
308 the pocket-like structure of YBX1 (Figure 6 H). Different dose of sciadopitysin  
309 increased the protein level of YBX1 in BMSCs in a graded manner (Figure 6 I).  
310 Sciadopitysin treatment could also increase the expression of FN1, TAZ, SP7, THBS1  
311 in BMSCs at the protein level (Figure 6 I).

312 To investigate the means by which sciadopitysin treatment increased the protein  
313 level of YBX1, we blocked the protein synthesis in BMSCs by cycloheximide (CHX)  
314 and found that sciadopitysin treatment slow down the degradation of YBX1 (Figure 6  
315 J). YBX1 was demonstrated to be degraded through ubiquitination<sup>39</sup>. Therefore, we  
316 further tested whether sciadopitysin treatment affected YBX1 ubiquitination and  
317 found that sciadopitysin significant decreased the ubiquitination level of YBX1  
318 (Figure 6 K). Previous studies reported that ubiquitin ligase FBXO33 could bind to  
319 and mediate the ubiquitination of YBX1<sup>39</sup>. To confirmed the interaction between  
320 FBXO33 and YBX1 and investigate which region of YBX1 protein could bind to  
321 FBXO33, we generated a series of YBX1 plasmid mutants, transfected them into  
322 BMSCs and performed co-IP assay. The results showed that deletion of the amino  
323 acid cites 128-322 (C-terminus) and the amino acid cites 42-53 (pocket area) of  
324 YBX1 impaired the interaction between YBX1 and FBXO33, suggesting that the

325 C-terminus and the pocket area is crucial for YBX1 binding to FBXO33 (Figure 6 L).  
326 We further confirmed the interaction between FBXO33 and YBX1 in BMSCs by IP  
327 test, and the interaction was suppressed by sciadopitysin treatment (Figure 6 M).  
328 Notably, sciadopitysin treatment could decreased the expression level of FBXO33 in  
329 BMSCs (Figure 6 N). These results suggested that sciadopitysin inhibit ubiquitination  
330 degradation of YBX1 both by decreased the level of ubiquitin ligase FBXO33 and  
331 prevent YBX1 from combining with FBXO33. Furthermore, sciadopitysin treatment  
332 also could partially restrain the exon skipping of *Sirt2*, *Sp7* and *Taz* in BMSCs  
333 isolated from 24-month-old mice (Figure 6 O), which indicated that sciadopitysin  
334 could alleviate age related mis-splicing of destiny genes in aged BMSCs.

### 335 **7. Sciadopitysin treatment ameliorated age-related bone loss in mice**

336 To further investigate whether sciadopitysin administration could alleviate  
337 age-related bone loss, 13-month-old C57/BL6J mice were administrated with  
338 sciadopitysin at 40mg/kg body weight per day or with vehicle for 2 months (Figure 7  
339 A).  $\mu$ CT analysis showed that sciadopitysin treated mice had higher bone volume,  
340 trabecular thickness, trabecular number and lower trabecular separation compared to  
341 vehicle treated and control mice (Figure 7 B-C). Sciadopitysin treated mice had  
342 significantly higher number of osteoblasts on the trabecular bone surfaces, as  
343 compared with control and vehicle-treated mice (Figure 7 D). Moreover, calcein  
344 double labeling analysis showed that sciadopitysin treated mice had significantly  
345 higher trabecular bone mineral apposition rates (MAR) compared with control and  
346 vehicle-treated mice (Figure 7 E). The number of adipocytes were also decreased by  
347 the treatment of sciadopitysin (Figure 7 G). However, the number of osteoclasts and  
348 adipocytes were not affected by the treatment of sciadopitysin (Figure 7 F). These  
349 results suggested that mice treated with sciadopitysin increased bone formation in old

350 mice.

351 Taken together, we demonstrated that RNA binding protein YBX1 can stimulate  
352 osteogenic differentiation and restrain senescence of BMSCs by regulating a cluster of  
353 genes including *Fnl1*, *Taz*, *Sirt2*, *Sp7* as a splicing factor in nucleus and regulating *Bgn*,  
354 *Colla2*, *Nrp2* and *Thbs1* as mRNA stabilized protein in cytoplasm. The decreased  
355 expression level of YBX1 during aging contribute to the debility of BMSCs including  
356 increased senescence and reduced osteogenesis. Moreover, we identified a natural  
357 small compound, sciadopitysin, which can delay the degradation of YBX1 and  
358 attenuate age-related bone loss (Figure 7H).

## 359 Discussion

360 Age-related dysfunction of BMSCs such as lineage switching between osteogenic  
361 and adipogenic fates and acceleration in senescence are critical in age-associated  
362 osteoporosis. Alternative splicing, as an important regulation pathway of gene  
363 translation, has a wide range of biological functions. Disruption in alternative splicing  
364 can lead to dysfunction or disease<sup>40</sup>. Aberrant of alternative splicing can accelerate  
365 cellular senescence<sup>41</sup>, disrupt the differentiation of mesenchymal stem cells<sup>18-20</sup>. It has  
366 been reported that MSC from old and young donors have different alternative splicing  
367 events<sup>42</sup>. However, whether aberrant of alternative splicing take part in the aging  
368 related dysfunction of BMSCs and how does it work remains unclear. In the present  
369 study we observed altered splicing events and changed gene expression pattern of  
370 BMSCs in mice during aging by whole transcriptome resequencing analysis and  
371 alternative splicing analysis. We further demonstrated that the deficiency of splicing  
372 factor YBX1 might be responsible for mis-splicing on BMSCs destiny genes and  
373 further result in senescence and change of differentiation direction in aged BMSCs.

374 As well-known transcriptional and translational regulator, YBX1 take part in

375 variety of RNA-dependent events, including pre-mRNA transcription and splicing,  
376 mRNA packaging, mRNA stability and translation<sup>23,43</sup>. At the cell level, the activities  
377 of YBX1 involve in the regulation of multiple processes of cellular biology, such as  
378 cell proliferation, differentiation, stress response, and malignant cell  
379 transformation<sup>29,33,38,43</sup>. In this study, we found the expression level of YBX1 in  
380 BMSCs was decreased during aging, and further demonstrated that BMSCs  
381 osteogenesis related genes *Fnl1* and *Sp7*, senescence related gene *Sirt2*, and *Taz* which  
382 has been reported both involved in osteogenic and adipogenic differentiation of  
383 BMSCs<sup>14,37</sup>, were identified as direct YBX1-mRNA binding targets and went through  
384 altered splicing. As a multifunctional RNA binding protein, YBX1 not only act as a  
385 splicing factor but also through other ways to regulate BMSCs fate decisions. Our  
386 previous research suggested that YBX1 could directly bind to the promoter and  
387 repress the expression of *P16*, and thus controlling the senescence of hypothalamic  
388 neural stem cells<sup>28</sup>. In this study we also identified 89 mRNAs in BMSCs, including  
389 several osteogenesis related genes and senescence related genes with YBX1-binding  
390 sites on 3' UTR region which showed altered expression upon YBX1 deletion. These  
391 results suggested that beside pre-mRNA alternative splicing, YBX1 also could  
392 regulate BMSCs fate decisions by directly regulating the transcription of specific  
393 genes or maintaining the stability of mRNAs. YBX1 involving the regulation of  
394 BMSCs fate decide during aging, and pre-mRNA alternative splicing is one of the  
395 important regulatory approaches.

396 Through further research, we found that BMSC specific YBX1 knockout mice had  
397 accelerated bone loss and bone marrow fat accumulation than the control mice,  
398 over-expression of YBX1 in bone marrow with AAV8-CMV-YBX1-GFP attenuated  
399 bone loss and bone marrow fat accumulation, which further confirmed that YBX1 is a



400 critical factor in orchestrating lineage commitment of BMSCs during aging. Our  
401 finding indicated that restore the level of YBX1 in BMSCs during aging might be a  
402 therapeutic strategy to alleviate age-associated osteoporosis.

403 Sciadopitysin is an amentoflanove-type biflavonoid, which is contained in taxus  
404 chinensis. Eun Mi Choi et al. using MC3T3-E1 cell lines demonstrated that  
405 sciadopitysin protect osteoblast function via upregulation of mitochondrial biogenesis.  
406 <sup>44,45</sup>. In our study, we identified sciadopitysin that could bind to YBX1 to attenuate its  
407 ubiquitination degradation, and further increase osteogenic differentiation and inhibit  
408 senescence of BMSCs. Treatment of sciadopitysin could attenuate age-related bone  
409 loss in mice and we also observed that sciadopitysin treatment could partially restrain  
410 the exon skipping of *Sirt2*, *Sp7* and *Taz* in BMSCs isolated from aged mice. All these  
411 results indicated that sciadopitysin perform its protection effect on bone mass partly  
412 through YBX1. In this study we didn't investigate other mechanisms involved and  
413 couldn't exclude the effect of sciadopitysin outside of YBX1, and the efficacy and  
414 safety of sciadopitysin need to be further evaluated in larger animals. We believe that  
415 sciadopitysin could act as a major candidate compound when designing of new  
416 anti-osteoporosis drugs.

417 Taken together, our study demonstrated that YBX1 worked as an alternative  
418 splicing factor in regulating BMSCs senescence and fate decisions and could be a  
419 potential therapeutic target for the treatment of age-related osteoporosis.

420

## 421 **Materials and Methods**

### 422 **Animals**

423 *YBX1*<sup>fllox/+</sup> mice were purchased from Cyagen Biosciences. *Prx1-cre* transgenic  
424 mice were purchased from the Jackson Laboratory. We mated *YBX1*<sup>fllox/+</sup> male mice

425 with *YBX1<sup>fllox/+</sup>* female mice to obtain *YBX1<sup>fllox/fllox</sup>* mice. We crossed *prx1-cre* mice  
426 with *YBX1<sup>fllox/fllox</sup>* to obtain *prx1-cre;YBX1<sup>fllox/+</sup>* mice. By mating *prx1-cre;YBX1<sup>fllox/+</sup>*  
427 male mice with *YBX1<sup>fllox/fllox</sup>* female mice, we obtained *prx1-cre;YBX1<sup>fllox/fllox</sup>* mice as  
428 homozygous conditional YBX1 knockout mice. The littermate *YBX1<sup>fllox/fllox</sup>* mice were  
429 used as controls.

430 All the mice used in this study were bred under specific-pathogen-free conditions  
431 of Laboratory Animal Research Center at Central South University. All the mice were  
432 kept in a C57BL/6 background. All animal care protocols and experiments were  
433 approved by the Medical Ethics Committee of Xiangya Hospital of Central South  
434 University. Approval number: 2019030350.

#### 435 **Intra-bone marrow injection of adeno-associated virus**

436 Intra-bone marrow delivery of virus was performed as previous reported <sup>14</sup>.  
437 Recombinant adeno-associated serotype 8 virus with CMV promoter for YBX1  
438 overexpression (rAAV8-YBX1-GFP) was purchased from Hanbio Biotechnology Co  
439 (Shanghai, China). The virus was diluted with sterile PBS and the viral titer used in  
440 the study was  $5 \times 10^{12}$  vg/ml. We used rAAV8-GFP as control. 5  $\mu$ l of either  
441 rAAV8-YBX1-GFP or rAAV8-GFP was delivered into the femoral medullary cavity  
442 through periosteal injection twice a month for 2 months.

#### 443 **Compound treatment**

444 Sciadopitysin (T5S2129), Eriocitrin (T6S0221), Isoginkgetin (T4S21320),  
445 Bilobetin (T4S2128), Theaflavin3-gallate (T3051), Punicalin (T4S1718), Ginkgetin  
446 (T4S2126), Cepharanthine (T0131) and Hinokiflavone (T4S0181) were purchased  
447 from TargetMol. For in vivo studies, sciadopitysin was treated by oral gavage at  
448 40mg/kg body weight/day for 2 months. For in vitro experiment, sciadopitysin,  
449 eriocitrin, isoginkgetin, bilobetin, theaflavin3-gallate, punicalin, ginkgetin,

450 cepharanthine and hinokiflavone were dissolved in DMSO and treated at the  
451 concentration of 10uM unless specified otherwise.

#### 452 **Primary mouse BMSC isolation and culture**

453 Primary mouse BMSCs were isolated as previously reported<sup>15</sup>. We flushed bone  
454 marrow cells from the tibia and femora of male mice and incubated the cells with  
455 anti-Sca-1-PE (108108; BioLegend), anti-CD29-FITC (102206; BioLegend),  
456 anti-CD45-PerCP (103132; BioLegend), and CD11b-PerCP (101226; BioLegend) for  
457 20 minutes at 4°C. For human BMSCs, human bone marrow cells were collected and  
458 incubated with FITC-, APC-, and PE-conjugated antibodies that recognized human  
459 Stro-1 (BioLegend, 340106), CD45 (BioLegend, 304012), and CD146 (BioLegend,  
460 361008) at 4°C for 30 minutes. The acquisition was conducted on a  
461 fluorescence-activated cell sorting (FACS) Aria model (BD Biosciences). FACS  
462 DIVE software version 6.1.3 (BD Biosciences) was used for the analysis.

463 The sorted mouse Sca-1<sup>+</sup>CD29<sup>+</sup>CD45<sup>-</sup>CD11b<sup>-</sup> BMSCs and human  
464 CD146<sup>+</sup>Stro-1<sup>+</sup>CD45<sup>-</sup> BMSCs were cultured for about 1 week to reach 80%–85%  
465 confluence. Then, first-passage BMSCs were digested with trypsin for about 1min and  
466 seeded in culture dishes for the enrichment of cell populations.

#### 467 **Cell culture, transfection, differentiation and senescence assay**

468 BMSCs were cultured in  $\alpha$ -MEM supplemented with 10% fetal bovine serum  
469 (Gibco), 100  $\mu$ g/ml streptomycin (Gibco) and 100 units/ml penicillin (Gibco) at 37 °C  
470 with a humidified atmosphere of 5% CO<sub>2</sub>.

471 For YBX1 knock down, adenovirus particles of shYBX1 and shControl were  
472 obtained from Hanbio Biotechnology Co (Shanghai, China). BMSCs were infected  
473 with adenovirus for 8 hours before proceeding to perform further experiments. For  
474 YBX1 over-expression, mYBX1 pcDNA3.1 was purchased from Youbio Biological

475 Technology. The mYBX1 plasmid and negative control were transfected into BMCSs  
476 using Lipofectamine 2000 (Invitrogen) for 6 hours before proceeding to perform  
477 further experiments.

478 For osteogenic differentiation assay, BMSCs were cultured in 6-well plates at a  
479 density of  $1.0 \times 10^6$  cells per well with osteogenic induction medium (10 mM  
480  $\beta$ -glycerol phosphate, 0.1  $\mu$ M dexamethasone, and 50  $\mu$ M ascorbate-2-phosphate) for  
481 3 weeks. Then, we stained the cells with 2% Alizarin Red (Cyagen Biosciences) to  
482 detect the cell matrix calcification. Alizarin Red was extracted from the matrix with  
483 cetyl-pyridinium chloride solution and quantified using spectrophotometry at 562 nm.

484 For adipogenic differentiation assay, BMSCs were plated in 6-well plates at a  
485 density of  $2.5 \times 10^6$  cells per well with adipogenic induction medium (1  $\mu$ M  
486 dexamethasone, 5  $\mu$ g/ml insulin and 0.5 mM 3-isobutyl-1-methylxanthine) for 10  
487 days. Culture medium was changed every 3 days. Lipid droplets in mature adipocytes  
488 were detected by Oil Red O staining according to the manufacturer's instruction  
489 (Cyagen Biosciences). Oil Red O was extracted from the matrix and quantified using  
490 spectrophotometry at 492 nm.

491 For cellular senescence assay, BMSCs were seeded in 6-well plates at a density of  
492  $1.0 \times 10^6$  cells per well for 24 hours. Senescent cells were stained using a  $\beta$ -Gal  
493 staining kit (Solarbio Science Technology) according to the manufacture' instructions.

#### 494 **Histochemistry analysis**

495 Histochemistry analysis was performed as previously described<sup>14,15</sup>. Briefly, After  
496 the mice were euthanized, bones were harvested, fixed in 4% paraformaldehyde  
497 (PFA) for 24 hours at 4°C, decalcified in 10% EDTA for 3 weeks at 4 °C, embedded in  
498 paraffin. 4- $\mu$ m-thick longitudinal bone sections were made and stained with TRAP  
499 (Sigma-Aldrich) and HE (Servicebio) according to the manufacturer's instructions.

500 **Immunohistochemical staining**

501 Immunohistochemical staining was performed as previously reported <sup>46</sup>. Briefly,  
502 after antigen retrieval, bone sections were blocked in 5% bovine serum albumin  
503 (BSA) for 1 hour at room temperature and incubated with primary antibody to  
504 osteocalcin (Takara, M173) at 4°C overnight. Then the bone sections were incubated  
505 with appropriate secondary antibody at room temperature for 1 hour. Finally, we  
506 detected the immunoactivity with an HRP-streptavidin detection system (Dako), and  
507 counterstained the slides with hematoxylin.

508 **Calcein double-labeling assay**

509 To evaluate dynamic bone formation ability, mice were administrated  
510 intraperitoneally with calcein (25 mg/kg, SigmaAldrich) at 8 and 2 days before  
511 euthanasia. After fixation in 70% ethanol, the samples were dehydrated in gradient  
512 ethanol. Then the calcein double labeled bones were embedded in methyl  
513 methacrylate. 5- $\mu$ m-thick longitudinal bone sections were made using a microtome  
514 and observed under a fluorescent microscope.

515 **Immunofluorescence staining**

516 Cultured BMSCs were fixed with 4% PFA for 15 minutes at room temperature.  
517 Then the cells were blocked with 5%BSA for 1 hour at room temperature, and  
518 incubated with YBX1 antibody (Cell Signaling Technology, 4202, 1:100), nestin  
519 antibody (Millipore, MAB353, 1:100) over night at 4°C. After that, the cells were  
520 incubated with Alexa 488 (Invitrogen, A21106) and Alexa 555 (Invitrogen, A21422)  
521 conjugated secondary antibodies and the nucleus were stained with Dapi.

522 For bone sections, after antigen retrieval, bone sections were blocked with 5%  
523 BSA for 1 hour at room temperature. Then the bone sections were incubated with  
524 YBX1 antibody (Cell Signaling Technology, 4202, 1:100), nestin antibody (Millipore,

525 MAB353, 1:100) over night at 4°C. Next, the bone sections were incubated with  
526 Alexa 488 (Invitrogen, A21106) and Alexa 555 (Invitrogen, A21422) conjugated  
527 secondary antibodies and the nuclear were stained with Dapi.

### 528 **RNA sequencing and analysis**

529 Total RNAs were extracted from shYBX1 and shControl infected BMSCs using  
530 Trizol reagent. The NanoPhotometer<sup>®</sup> spectrophotometer (IMPLEN, CA, USA) was  
531 used to check RNA purity. RNA integrity was evaluated by the RNA Nano 6000  
532 Assay Kit of the Bioanalyzer 2100 system. NEBNext<sup>®</sup> Ultra<sup>™</sup> RNA Library Prep  
533 Kit for Illumina<sup>®</sup> (NEB, USA) was used to generate sequencing libraries according to  
534 manufacturer's recommendations. We controled the quality of RNA-seq data by  
535 removing low quality reads, reads containing ploy-N, reads containing adapter from  
536 raw data. We mapped clean data to the reference genome using Hisat2 v2.0.5. The  
537 DESeq2 R package (1.16.1) was used to perform differential expression analysis of  
538 two groups. The gene expression is considered to be significantly different if  
539 displaying  $\geq 1.5$  fold change and P value  $< 0.05$ . Event level differential splicing was  
540 calculated with the EventPointer package<sup>25</sup> in R.

### 541 **CLIP**

542 BMSCs ( $1 \times 10^8$  cells) were treated with 4-thiouridine (100  $\mu$ M) for 16h. After 16 h  
543 incubation, cells were washed twice with 10 ml of ice-cold PBS and then were UV  
544 irradiated at 150 mj/cm<sup>2</sup> on ice. Cells were collected with a clear cell scraper and  
545 transferred into a new 15 ml centrifuge tube and then pelleted at 1,000 g for 5min at  
546 4°C. The supernatant was discarded and the cell pellet was re-suspended with 12 mL  
547  $1 \times$  cell lysis buffer containing 120  $\mu$ L 100 $\times$ DTT and 120  $\mu$ L 100 $\times$  Protease inhibitor  
548 and incubated on ice for 10min. Cell lysates were centrifuged at 14,000 g for 15  
549 minutes at 4°C and transfered supernatant into a new 15 ml centrifuge tube. For CLIP

550 procedure, 8ml supernatant was incubated with 5  $\mu$ g YBX1 antibody (Cell Signaling  
551 Technology, 4202) and 4ml supernatant was incubated with 2  $\mu$ g IgG antibody  
552 overnight at 4°C. The next day, CLIP samples were further incubated with 40  $\mu$ L  
553 ProteinA/G magnetic beads for 3h at 4°C. The magnetic beads were washed twice  
554 with 1 $\times$ IP wash buffer and subsequently resuspended in 60  $\mu$ L 1 $\times$ IP wash buffer  
555 containing 6  $\mu$ L RNase T1. The magnetic beads were incubated at 22°C for 60min and  
556 at ice for 5min and then washed twice with 1 $\times$ IP wash buffer. Next, the magnetic  
557 beads were resuspended in 100  $\mu$ L 1 $\times$ IP wash buffer containing 20  $\mu$ L DNase I and  
558 incubated at 37°C for 15min and at ice for 5min. The beads were Place on the  
559 magnetic separator then washed twice with 1 $\times$ IP wash buffer. Finally, the magnetic  
560 beads were resuspended in 1 $\times$ 100 $\mu$ l Proteinase K and incubated at 55°C for 30min. To  
561 remove the beads by a magnetic separator, and transfer the supernatant into a new  
562 1.5ml centrifuge tube. An equal volume acidic phenol: chloroform: isoamylalcohol  
563 (25:24:1) and equal volume chloroform was used to clear the supernatant. After, the  
564 clear supernatant was added with 2 volumes of ethanol and one microliter of glycogen  
565 and then precipitated at -20°C for 2h. The supernatant was centrifuge at 14,000 rpm  
566 for 30 minutes at 4°C and discarded the supernatant. The precipitate was washed  
567 twice with 75% ethanol and re-suspended with 10  $\mu$ L RNase-free water. The  
568 recovered RNA was used to perform the high-throughput sequencing with Illumina  
569 NextSeq 500 system under the help of ABLife Inc and Wuhan Igenebook  
570 Biotechnology Co.,Ltd.

#### 571 **Liquid chromatography (LC)–MS/MS measurement**

572 We used Q-Exactive mass spectrometer (Thermo Fisher) connected online to an  
573 Easy-nLC 1000(Thermo Fisher) to analyze the LC-MS/MS. Separation of peptides  
574 was conducted using Zeba Spin columns (Pierce) in a gradient from 5–65% in buffer

575 B (0.1% formic acid, 84% acetonitrile). The columns temperature was kept at 50 °C in  
576 an oven. We analyzed the peptides using a full scan (300-1,600 m/z, R = 60,000 at  
577 200 m/z) with 3e6 ions as the target. Then we performed high energy collisional  
578 disassociation for fragmentation of top 20 most rich isotype patterns with a charge  $\geq 2$   
579 MS/MS scan. All data were collected with X-caliber software (Thermo Fisher).

#### 580 **ChIP-seq**

581 BMSCs were crosslinked with 1% formaldehyde for 10 min at room temperature  
582 and nuclei were extracted, lysed and sheared on ice. Chromatin was diluted with ChIP  
583 buffer, cleared and incubated with 5ug YBX1 antibody (Cell Signaling Technology,  
584 4202) overnight at 4°C. The antibody/chromatin complex was immunoprecipitated  
585 with protein G beads. Then the antibody/chromatin complex was extensively washed,  
586 eluted and de-crosslinked. After purification, ChIP DNA was used to prepare  
587 ChIP-sequencing libraries with SimpleChIP<sup>®</sup> ChIP-seq DNA Library Prep Kit for  
588 Illumina<sup>®</sup> and subjected to sequencing on an Illumina NextSeq platform under the  
589 help of Seqhealth Technology Co., LTD (Wuhan, China).

#### 590 **qRT-PCR analysis**

591 We used Trizol reagent (Invitrogen) to isolate total RNA from cells based on the  
592 standard protocol. We conducted reverse transcription with 1ug total RNA with Evo  
593 M-MLV RT Kit with gDNA Clean for qPCR AG11705 (Accurate Biotechnology  
594 (Hunan) Co., Ltd). Quantitafication of mRNA was detected by qRT-PCR with  
595 SYBR<sup>®</sup> Green Premix Pro Taq HS qPCR Kit ( Rox Plus ) AG11718  
596 (Accurate Biotechnology(Hunan) Co., Ltd).

#### 597 **Western blot**

598 Western blot was performed as previously described <sup>47</sup>. The antibodies used for  
599 western blot are: YBX1 (D2A11) (Cell Signaling Technology, 9744, 1:1000),  $\beta$  actin



600 (Origene, TA811000, 1:5000), GAPDH (Origene, TA802519, 1:5000), PCNA  
601 (BOSTER Biological Technology, BM0104, 1:5000), PPARG $\gamma$  (81B8)(Cell Signaling  
602 Technology, 2443, 1:1000), P16 (Sigma-Aldrich, SAB5300498, 1:1000), Fibronectin  
603 (Santa Cruz, sc-8422, 1:500), TAZ (E8E9G) (Cell Signaling Technology, 83669,  
604 1:1000), Sirt2 (Abcam, ab211033, 1:1000), FBXO33 (Novus Biologicals,  
605 NBP1-91890, 1:1000), Thrombospondin 1 (Santa Cruz, sc-393504, 1:500), Colla2  
606 (Santa Cruz, sc-393573, 1:500), NRP2 (Santa Cruz, sc-13117, 1:500), FAK (Cell  
607 Signaling Technology, 3285, 1:1000), Phospho-FAK (Tyr397) (Cell Signaling  
608 Technology, 3283, 1:1000), Phospho-FAK (Tyr576/577) (Cell Signaling Technology,  
609 3281, 1:1000), Phospho-FAK (Tyr925) (Cell Signaling Technology, 3284, 1:1000),  
610 RUNX2 (Abcam, ab23981, 1:1000), SP7 (Abcam, ab22552, 1:1000).

#### 611 **Co-immunoprecipitation assays**

612 For endogenous co-IP, BMSCs were treated with sciadopitysin or vehicle. We  
613 incubate total cell lysates overnight at 4°C with YBX1 antibody (4202, Cell Signaling  
614 Technology) or IgG as control. We used Dynabeads Protein G to collect the  
615 antigen-antibody complexes. After three times washes, the complexes were subjected  
616 to immunoblotting with appropriate antibodies.

617 For exogenous co-IP, BMSCs were transfected with a series of HA-tagged mutated  
618 YBX1 plasmid and His-tagged FBXO33 plasmid using Lip2000. Two days after  
619 transfection, total cell lysates were collected and incubated with antibody (ab9108;  
620 anti-His tag antibody; Abcam) overnight at 4°C. Dynabeads Protein G was used to  
621 collect the antigen-antibody complexes. After three times washes, the complexes were  
622 subjected to immunoblotting with appropriate antibodies.

#### 623 **Molecular docking**

624 Molecular docking was conducted as previously described<sup>27</sup>. Briefly, the structure

625 of mouse YBX1 was modeled on the basis of structure of human YBX1 (PDB  
626 code:1H95) using MODELER software for their high homology as previously  
627 described<sup>27</sup>. We performed virtual screening between the natural small compounds  
628 library (Target Mol, US, Boston ) and YBX1 through Autodock Vina and Dock  
629 6.7. We used the autodock tools (ADT) to set the virtual screening parameters. A small  
630 number of top-ranked compounds were purchased from Target Molecule Corp and used  
631 as candidates for further study.

### 632 **Micro-CT analysis**

633 The femurs were fixed in 4% paraformaldehyde for 24 hours, then scanned and  
634 analyzed by high-resolution  $\mu$ CT (VIVACT 80; SCANCO Medical AG, Switzerland).  
635 Scanner was set at a current of 145  $\mu$ A and a voltage of 55 kV with a resolution of 15  
636  $\mu$ m per pixel. The image reconstruction software (NRecon, version 1.6, Bioz), data  
637 analysis software (CT Analyser, version 1.9, Bruker microCT) and 3-dimensional  
638 model visualization software ( $\mu$ CT Volume, version 2.0, Bruker microCT) were used  
639 to analyse the BV/TV, Tb. Th, Tb. N, and Tb. Sp of the distal femoral metaphyseal  
640 trabecular bone. The region of interest was defined as 5% of femoral length below the  
641 growth plate.

### 642 **Study population.**

643 Human bone marrow samples were obtained from patients undergoing knee joint  
644 replacement because of osteoarthritis, undergoing hip joint replacement because of  
645 femoral neck and/or femoral head fractures or undergoing open reduction internal  
646 fixation because of tibia or femur shaft fractures. Human bone marrow aspiration and  
647 collection were conducted by the Orthopedic Surgery Department at Xiangya Hospital  
648 of Central South University. A total of 60 patients (30 male and 30 female) were  
649 selected on the basis of the inclusion and exclusion criteria. All subjects were

650 screened using a detailed questionnaire, disease history, and physical examination.  
651 Subjects were excluded from the study if they had conditions affecting bone  
652 metabolism or previous pathological fractures within 1 year or had received treatment  
653 with glucocorticoids, estrogens, thyroid hormone, parathyroid hormone, fluoride,  
654 bisphosphonate, calcitonin, thiazide diuretics, barbiturates, antiseizure medication.

### 655 **Statistics**

656 The data are expressed as mean  $\pm$  SEM. The data is normally distributed,  
657 Two-tailed Student's t test is used to compare between two groups. One-way analysis  
658 of variance (ANOVA) is used to compare the difference between multiple groups. The  
659 statistics is applied by SPSS 20.0. Statistical differences were supposed to be  
660 significant when  $P < 0.05$ .

661

### 662 **Supplementary Materials: Including Supplementary Figure 1-5**

663

### 664 **Author Contribution**

665 Y.X designed the experiments and generated data; Y.X and G.P.C carried out  
666 majority of the experiments; X.F, Q.G, T.S, Y.H and C.J.L contributed to acquiring  
667 data; X.H.L, Y.J.Z and M.Y co-advised the study; G.P.C and M.Y wrote the manuscript;  
668 Y.J.Z and M.Y is the guarantor of this work and has full access to all the data in this  
669 study and takes the responsibility for data accuracy.

670

### 671 **Acknowledgements**

672 This work was supported by grants from National Natural Science Foundation of  
673 China (Grant No. 92149306, 82120108009, 81930022, 81900810, 82170903,  
674 81900732, 82000811), the National Postdoctoral Program for Innovative Talents of

675 China Postdoctoral Science Foundation (Grant No: BX20200390), China Postdoctoral  
676 Science Foundation (Grant No: 2021M703642) and Hunan Provincial Science and  
677 Technology Department (Grant No: 2020RC2011).

678

679

680

681

682

683

684

685

686

## 687 **References**

688 1 Lee, Y. & Rio, D. C. Mechanisms and Regulation of Alternative Pre-mRNA  
689 Splicing. *Annu Rev Biochem* **84**, 291-323,  
690 doi:10.1146/annurev-biochem-060614-034316 (2015).

691 2 Pan, Q., Shai, O., Lee, L. J., Frey, B. J. & Blencowe, B. J. Deep surveying of  
692 alternative splicing complexity in the human transcriptome by high-throughput  
693 sequencing. *Nat Genet* **40**, 1413-1415, doi:10.1038/ng.259 (2008).

694 3 Baralle, F. E. & Giudice, J. Alternative splicing as a regulator of development  
695 and tissue identity. *Nat Rev Mol Cell Biol* **18**, 437-451,  
696 doi:10.1038/nrm.2017.27 (2017).

697 4 Bowler, E. & Oltean, S. Alternative Splicing in Angiogenesis. *Int J Mol Sci* **20**,  
698 doi:10.3390/ijms20092067 (2019).

699 5 Park, J. W., Fu, S., Huang, B. & Xu, R. H. Alternative splicing in

- 700 mesenchymal stem cell differentiation. *Stem Cells* **38**, 1229-1240,  
701 doi:10.1002/stem.3248 (2020).
- 702 6 Bhadra, M., Howell, P., Dutta, S., Heintz, C. & Mair, W. B. Alternative  
703 splicing in aging and longevity. *Hum Genet* **139**, 357-369,  
704 doi:10.1007/s00439-019-02094-6 (2020).
- 705 7 Urbanski, L. M., Leclair, N. & Anczukow, O. Alternative-splicing defects in  
706 cancer: Splicing regulators and their downstream targets, guiding the way to  
707 novel cancer therapeutics. *Wiley Interdiscip Rev RNA* **9**, e1476,  
708 doi:10.1002/wrna.1476 (2018).
- 709 8 Mazin, P. *et al.* Widespread splicing changes in human brain development and  
710 aging. *Mol Syst Biol* **9**, 633, doi:10.1038/msb.2012.67 (2013).
- 711 9 Southworth, L. K., Owen, A. B. & Kim, S. K. Aging mice show a decreasing  
712 correlation of gene expression within genetic modules. *PLoS Genet* **5**,  
713 e1000776, doi:10.1371/journal.pgen.1000776 (2009).
- 714 10 Harries, L. W. *et al.* Human aging is characterized by focused changes in gene  
715 expression and deregulation of alternative splicing. *Aging Cell* **10**, 868-878,  
716 doi:10.1111/j.1474-9726.2011.00726.x (2011).
- 717 11 Pittenger, M. F. *et al.* Multilineage potential of adult human mesenchymal  
718 stem cells. *Science* **284**, 143-147, doi:10.1126/science.284.5411.143 (1999).
- 719 12 Sekiya, I., Larson, B. L., Vuoristo, J. T., Cui, J. G. & Prockop, D. J.  
720 Adipogenic differentiation of human adult stem cells from bone marrow  
721 stroma (MSCs). *J Bone Miner Res* **19**, 256-264, doi:10.1359/JBMR.0301220  
722 (2004).
- 723 13 Guilak, F. *et al.* Control of stem cell fate by physical interactions with the  
724 extracellular matrix. *Cell Stem Cell* **5**, 17-26, doi:10.1016/j.stem.2009.06.016

- 725 (2009).
- 726 14 Li, C. J. *et al.* Long noncoding RNA Bmncr regulates mesenchymal stem cell  
727 fate during skeletal aging. *J Clin Invest* **128**, 5251-5266,  
728 doi:10.1172/JCI99044 (2018).
- 729 15 Li, C. J. *et al.* MicroRNA-188 regulates age-related switch between osteoblast  
730 and adipocyte differentiation. *J Clin Invest* **125**, 1509-1522,  
731 doi:10.1172/JCI77716 (2015).
- 732 16 Li, H. *et al.* FOXP1 controls mesenchymal stem cell commitment and  
733 senescence during skeletal aging. *J Clin Invest* **127**, 1241-1253,  
734 doi:10.1172/JCI89511 (2017).
- 735 17 Chen, Q. *et al.* Fate decision of mesenchymal stem cells: adipocytes or  
736 osteoblasts? *Cell Death Differ* **23**, 1128-1139, doi:10.1038/cdd.2015.168  
737 (2016).
- 738 18 Makita, N. *et al.* Two of four alternatively spliced isoforms of RUNX2 control  
739 osteocalcin gene expression in human osteoblast cells. *Gene* **413**, 8-17,  
740 doi:10.1016/j.gene.2007.12.025 (2008).
- 741 19 Milona, M. A., Gough, J. E. & Edgar, A. J. Expression of alternatively spliced  
742 isoforms of human Sp7 in osteoblast-like cells. *BMC Genomics* **4**, 43,  
743 doi:10.1186/1471-2164-4-43 (2003).
- 744 20 Aprile, M. *et al.* PPARgammaDelta5, a Naturally Occurring  
745 Dominant-Negative Splice Isoform, Impairs PPARgamma Function and  
746 Adipocyte Differentiation. *Cell Rep* **25**, 1577-1592 e1576,  
747 doi:10.1016/j.celrep.2018.10.035 (2018).
- 748 21 Deschenes, M. & Chabot, B. The emerging role of alternative splicing in  
749 senescence and aging. *Aging Cell* **16**, 918-933, doi:10.1111/acel.12646 (2017).

- 750 22 Skabkin, M. A., Liabin, D. N. & Ovchinnikov, L. P. [Nonspecific and specific  
751 interaction of Y-box binding protein 1 (YB-1) with mRNA and  
752 posttranscriptional regulation of protein synthesis in animal cells]. *Mol Biol*  
753 (*Mosk*) **40**, 620-633, doi:10.1134/s0026893306040145 (2006).
- 754 23 Eliseeva, I. A., Kim, E. R., Guryanov, S. G., Ovchinnikov, L. P. & Lyabin, D.  
755 N. Y-box-binding protein 1 (YB-1) and its functions. *Biochemistry (Mosc)* **76**,  
756 1402-1433, doi:10.1134/S0006297911130049 (2011).
- 757 24 Kohno, K., Izumi, H., Uchiumi, T., Ashizuka, M. & Kuwano, M. The  
758 pleiotropic functions of the Y-box-binding protein, YB-1. *Bioessays* **25**,  
759 691-698, doi:10.1002/bies.10300 (2003).
- 760 25 Guo, C. *et al.* Nanog RNA-binding proteins YBX1 and ILF3 affect  
761 pluripotency of embryonic stem cells. *Cell Biol Int* **40**, 847-860,  
762 doi:10.1002/cbin.10539 (2016).
- 763 26 Lyabin, D. N., Eliseeva, I. A. & Ovchinnikov, L. P. YB-1 protein: functions  
764 and regulation. *Wiley Interdiscip Rev RNA* **5**, 95-110, doi:10.1002/wrna.1200  
765 (2014).
- 766 27 Xiao, Y. Z. *et al.* Reducing Hypothalamic Stem Cell Senescence Protects  
767 against Aging-Associated Physiological Decline. *Cell Metab* **31**, 534-548 e535,  
768 doi:10.1016/j.cmet.2020.01.002 (2020).
- 769 28 Kotake, Y. *et al.* YB1 binds to and represses the p16 tumor suppressor gene.  
770 *Genes Cells* **18**, 999-1006, doi:10.1111/gtc.12093 (2013).
- 771 29 Evans, M. K. *et al.* Ybx1 fine-tunes PRC2 activities to control embryonic  
772 brain development. *Nat Commun* **11**, 4060, doi:10.1038/s41467-020-17878-y  
773 (2020).
- 774 30 Allemand, E., Hastings, M. L., Murray, M. V., Myers, M. P. & Krainer, A. R.

- 775           Alternative splicing regulation by interaction of phosphatase PP2C $\gamma$   
776           with nucleic acid-binding protein YB-1. *Nat Struct Mol Biol* **14**, 630-638,  
777           doi:10.1038/nsmb1257 (2007).
- 778    31    Dutertre, M. *et al.* Cotranscriptional exon skipping in the genotoxic stress  
779           response. *Nat Struct Mol Biol* **17**, 1358-1366, doi:10.1038/nsmb.1912 (2010).
- 780    32    Wei, W. J. *et al.* YB-1 binds to CAUC motifs and stimulates exon inclusion by  
781           enhancing the recruitment of U2AF to weak polypyrimidine tracts. *Nucleic*  
782           *Acids Res* **40**, 8622-8636, doi:10.1093/nar/gks579 (2012).
- 783    33    Jayavelu, A. K. *et al.* Splicing factor YBX1 mediates persistence of  
784           JAK2-mutated neoplasms. *Nature* **588**, 157-163,  
785           doi:10.1038/s41586-020-2968-3 (2020).
- 786    34    Marchesini, M. *et al.* ILF2 Is a Regulator of RNA Splicing and DNA Damage  
787           Response in 1q21-Amplified Multiple Myeloma. *Cancer Cell* **32**, 88-100 e106,  
788           doi:10.1016/j.ccell.2017.05.011 (2017).
- 789    35    Ma, S. *et al.* Caloric Restriction Reprograms the Single-Cell Transcriptional  
790           Landscape of *Rattus Norvegicus* Aging. *Cell* **180**, 984-1001 e1022,  
791           doi:10.1016/j.cell.2020.02.008 (2020).
- 792    36    Mendez-Ferrer, S. *et al.* Mesenchymal and haematopoietic stem cells form a  
793           unique bone marrow niche. *Nature* **466**, 829-834, doi:10.1038/nature09262  
794           (2010).
- 795    37    Hong, J. H. *et al.* TAZ, a transcriptional modulator of mesenchymal stem cell  
796           differentiation. *Science* **309**, 1074-1078, doi:10.1126/science.1110955 (2005).
- 797    38    Zhang, Y. *et al.* LncRNA DSCAM-AS1 interacts with YBX1 to promote  
798           cancer progression by forming a positive feedback loop that activates FOXA1  
799           transcription network. *Theranostics* **10**, 10823-10837, doi:10.7150/thno.47830



800 (2020).

801 39 Lutz, M., Wempe, F., Bahr, I., Zopf, D. & von Melchner, H. Proteasomal  
802 degradation of the multifunctional regulator YB-1 is mediated by an F-Box  
803 protein induced during programmed cell death. *FEBS Lett* **580**, 3921-3930,  
804 doi:10.1016/j.febslet.2006.06.023 (2006).

805 40 Fan, X. & Tang, L. Aberrant and alternative splicing in skeletal system disease.  
806 *Gene* **528**, 21-26, doi:10.1016/j.gene.2013.06.027 (2013).

807 41 Maier, B. *et al.* Modulation of mammalian life span by the short isoform of  
808 p53. *Genes Dev* **18**, 306-319, doi:10.1101/gad.1162404 (2004).

809 42 Peffers, M. J. *et al.* Decoding the Regulatory Landscape of Ageing in  
810 Musculoskeletal Engineered Tissues Using Genome-Wide DNA Methylation  
811 and RNASeq. *PLoS One* **11**, e0160517, doi:10.1371/journal.pone.0160517  
812 (2016).

813 43 Shah, A., Lindquist, J. A., Rosendahl, L., Schmitz, I. & Mertens, P. R. Novel  
814 Insights into YB-1 Signaling and Cell Death Decisions. *Cancers (Basel)* **13**,  
815 doi:10.3390/cancers13133306 (2021).

816 44 Suh, K. S., Lee, Y. S., Kim, Y. S. & Choi, E. M. Sciadopitysin protects  
817 osteoblast function via its antioxidant activity in MC3T3-E1 cells. *Food Chem*  
818 *Toxicol* **58**, 220-227, doi:10.1016/j.fct.2013.04.028 (2013).

819 45 Choi, E. M., Suh, K. S., Rhee, S. Y. & Kim, Y. S. Sciadopitysin alleviates  
820 methylglyoxal-mediated glycation in osteoblastic MC3T3-E1 cells by  
821 enhancing glyoxalase system and mitochondrial biogenesis. *Free Radic Res* **48**,  
822 729-739, doi:10.3109/10715762.2014.903562 (2014).

823 46 Yang, M. *et al.* MiR-497 approximately 195 cluster regulates angiogenesis  
824 during coupling with osteogenesis by maintaining endothelial Notch and

825 HIF-1alpha activity. *Nat Commun* **8**, 16003, doi:10.1038/ncomms16003  
826 (2017).

827 47 Yang, M. *et al.* Kruppel-like factor 3 inhibition by mutated lncRNA Reg1cp  
828 results in human high bone mass syndrome. *J Exp Med* **216**, 1944-1964,  
829 doi:10.1084/jem.20181554 (2019).

830

831

832

833

834

835

836

837

838

839

840

841

## 842 **Figure legends**

843 **Figure 1 Dysregulated pre-mRNA alternative splicing and altered gene**  
844 **expression pattern in BMSCs during aging**

845 (A) Schematic diagram of isolating and culture of BMSCs from 2-month-old and  
846 24-month-old mice. (B) Representative images of  $\beta$ -Gal staining (left panel) and  
847 quantification of  $\beta$ -Gal positive cells (right panel) of BMSCs isolated from  
848 2-month-old and 24-month-old mice. Scale bar: 50  $\mu$ m. (C) Representative images of  
849 Alizarin Red staining at 21 days of osteogenic induction (left panel) and

850 quantification of calcification (right panel) of BMSCs isolated from 2-month-old and  
851 24-month-old mice by detecting the amount of Alizarin Red extracted from the matrix.  
852 (D) Schematic diagram of experimental process of alternative splicing analysis. (E)  
853 Histogram of the differentially spliced events between BMSCs isolated from  
854 2-month-old and 24-month-old mice. (F) GO analysis of differentially expressed  
855 genes between BMSCs isolated from 2-month-old and 24-month-old mice. (G) Heat  
856 map of differentially expressed genes between BMSCs isolated from 2-month-old and  
857 24-month-old mice. (H-I) Heat map of differentially expressed genes of RNA splicing  
858 proteins (H) and Venn diagrams of overlapping genes between differentially expressed  
859 genes, RNA binding proteins and RNA splicing proteins datasets (I) between BMSCs  
860 isolated from 2-month-old and 24-month-old mice. (J) Enrichment network  
861 representing the top 10 enriched terms of differentially expressed RNA splicing  
862 proteins between BMSCs isolated from 2-month-old and 24-month-old mice.  
863 Enriched terms with high similarity were clustered and rendered as a network, while  
864 each node represents an enriched term and is colored according to its cluster. Node  
865 size indicates the number of enriched genes, and the line thickness indicates the  
866 similarity score shared by two enriched terms. (K) The list of differentially expressed  
867 RNA splicing proteins between BMSCs isolated from 2-month-old and 24-month-old  
868 mice whose functions were clustered in mRNA splicing and regulation of RNA  
869 splicing. Data shown as mean  $\pm$  SEM. \*\*,  $P < 0.01$ ; \*\*\*,  $P < 0.001$ ; Student's t test.

870 **Figure 2 Splicing factor YBX1 regulated fate decision and senescence of BMSCs**  
871 **and showed decreased expression during aging**

872 (A) Representative images of immunofluorescence staining of YBX1 (green) in  
873 primary BMSCs. Scale bar: 100 $\mu$ m. (B-C) Representative immunohistochemical  
874 staining image of YBX1 (green) and Nestin (red) (B) and quantification of YBX1<sup>+</sup>

875 Nestin<sup>+</sup> cells number (C) in femoral bone marrow. Scale bar: 100  $\mu$ m. (D) Western  
876 blot analysis of the expression of YBX1 in BMSCs isolated from mice with different  
877 age. (E) qRT-PCR analysis of the expression of *Ybx1* and *P16* in BMSCs isolated  
878 from mice with different age. (F) Age-associated changes of YBX1 levels in human  
879 BMSCs from 30 males (up panel) and 30 females (down panel). (G) Western blot  
880 analysis of the expression of YBX1 in cultured BMSCs during osteogenic  
881 differentiation and adipogenic differentiation. (H and I) qRT-PCR analysis of the  
882 expression of *Ybx1* in cultured BMSCs during osteogenic differentiation (H) and  
883 adipogenic differentiation (I). (J) Representative images of immunofluorescence  
884 staining of YBX1 (green) in BMSCs during osteogenic and adipogenic differentiation.  
885 Scale bar: 100 $\mu$ m. (K and L) Representative images of Alizarin Red staining (K) and  
886 quantification of calcification (L) by detecting the amount of Alizarin Red extracted  
887 from the matrix in BMSCs transfected with adenovirus driven control and YBX1  
888 shRNA at 21 days of osteogenic induction. (M and N) Representative images of Oil  
889 Red O staining (M) and quantification of lipid formation by detecting the amount of  
890 Oil Red O extracted from the matrix (N) in BMSCs at 10 days of adipogenic  
891 induction. Scale bar: 50  $\mu$ m. (O and P) Representative images of  $\beta$ -Gal staining (O)  
892 and quantification (P) of  $\beta$ -Gal positive cells in BMSCs. Scale bar: 50  $\mu$ m. (Q) Heat  
893 map of differentially expressed genes between BMSCs transfected with adenovirus  
894 driven control and YBX1 shRNA. (R-T) Relative FPKM level of the expression of  
895 osteogenic differentiation related genes (R), adipogenic differentiation related genes  
896 (S) and senescence related genes (T) between BMSCs transfected with adenovirus  
897 driven control and YBX1 shRNA. Data shown as mean  $\pm$  SEM. #, no significant  
898 difference; \*,  $P < 0.05$ ; \*\*,  $P < 0.01$ ; \*\*\*,  $P < 0.001$ ; Student's t test for C, E, R-T and  
899 One-way ANOVA for H-I, L, N, P.

900 **Figure 3 Depletion of YBX1 in BMSCs results in accelerated bone loss and bone**  
901 **marrow fat accumulation.**

902 (A-E) Representative  $\mu$ CT images (A) and quantitative  $\mu$ CT analysis of trabecular  
903 bone microarchitecture (B-E) in distal femora from 3- and 12-month-old male  
904 *YBX1<sup>Prx1-CKO</sup>* mice and *YBX1<sup>fllox/fllox</sup>* mice. (F) Representative images of HE staining  
905 in distal femora. Scale bar: 300 $\mu$ m. (G) Quantification of the number of adipocytes  
906 related to tissue area (N. adipocytes/T.Ar). (H) Representative images of osteocalcin  
907 (OCN) immunohistochemical staining in distal femora. Arrows point to osteocalcin  
908 positive cells. Scale bar: 150 $\mu$ m. (I) Quantification of osteocalcin positive cells in  
909 bone surface. Number of OCN<sup>+</sup> cells per bone perimeter (N. Ocn<sup>+</sup>/B.Pm). (J)  
910 Representative images of calcein double labeling of trabecular bone. Scale bar:  
911 150 $\mu$ m. (K) Quantification of mineral apposition rates (MARs). Data shown as  
912 mean  $\pm$  SEM. #, no significant difference; \*,  $P < 0.05$ ; \*\*,  $P < 0.01$ ; \*\*\*,  $P < 0.001$ ;  
913 One-way ANOVA.

914 **Figure 4 Over-expression of YBX1 attenuated fat accumulation and promoted**  
915 **bone formation in aged mice**

916 (A) Representative images of Alizarin Red staining (left panel) and quantification of  
917 calcification (right panel) by detecting the amount of Alizarin Red extracted from the  
918 matrix in BMSCs transfected with control or YBX1 plasmid at 21 days of osteogenic  
919 induction. (B) Representative images (left panel) and quantification (right panel) of  
920 Oil Red O staining in BMSCs transfected with control or YBX1 plasmid at 10 days of  
921 adipogenic induction. Scale bar: 50  $\mu$ m. (C) Representative images of  $\beta$ -Gal staining  
922 (left panel) and quantification (right panel) of  $\beta$ -Gal positive cells in BMSCs  
923 transfected with control or YBX1 plasmid. Scale bar: 50  $\mu$ m. (D) Western blot  
924 analysis of the expression of YBX1, SP7, PPAR $\gamma$  and P16 in BMSCs. (E) qRT-PCR

925 analysis of the expression of YBX1 in BMSCs from mice with AAV8-YBX1-GFP or  
926 AAV8- GFP transfection. (F-J) Representative  $\mu$ CT images (F) and quantitative  $\mu$ CT  
927 analysis of trabecular bone microarchitecture (G–J) in distal femora from  
928 15-month-old mice with AAV8-YBX1-GFP or AAV8- GFP transfection. (K)  
929 Representative images of HE staining in distal femora. Scale bar: 300 $\mu$ m. (L)  
930 Quantification of the number of adipocytes related to tissue area (N. adipocytes/T.Ar).  
931 (M) Representative images of osteocalcin immunohistochemical staining in distal  
932 femora. Arrows point to osteocalcin positive cells. Scale bar: 150 $\mu$ m. (N)  
933 Quantification of osteocalcin positive cells in bone surface. Number of OCN<sup>+</sup> cells  
934 per bone perimeter (N. Ocn<sup>+</sup>/B.Pm). Data shown as mean  $\pm$  SEM. #, no significant  
935 difference; \*,  $P < 0.05$ ; \*\*,  $P < 0.01$ ; \*\*\*,  $P < 0.001$ ; Student's t test.

936 **Figure 5 YBX1 regulated the fate of BMSCs through regulating the splicing of**  
937 **pre-mRNAs critical for differentiation and senescence**

938 (A) Schematic diagram of experimental process of anti-YBX1 CLIP analysis. (B)  
939 Genomic distribution of YBX1 CLIP-seq peaks. (C) Enriched motifs for YBX1  
940 binding. Inset shows consensus sequence, deduced from the top ten motifs. (D)  
941 Venn diagrams of overlapping genes targeted by YBX1 and showed alternative  
942 splicing upon YBX1 deletion. (E-H) RNA-seq read coverage across *Fnl1* (E), *Sirt2*  
943 (F), *Sp7* (G) and *Taz* (H) from BMSCs isolated from *YBX1<sup>Prx1-CKO</sup>* mice and  
944 *YBX1<sup>lox/lox</sup>* mice. (I) Mean CLIP density near exons repressed (blue), activated (red)  
945 by YBX1. (J-M) Semi-quantitative PCR showed the different isoforms of *Taz* (J), *Sp7*  
946 (K), *Sirt2* (L) and reference genes *Gapdh* (M) between BMSCs isolated from  
947 2-month-old or 24-month-old mice and from *YBX1<sup>Prx1-CKO</sup>* mice or *YBX1<sup>lox/lox</sup>* mice.  
948 (N-O) Representative images of Alizarin Red staining (left panel) and Quantification  
949 of calcification by detecting the amount of Alizarin Red extracted from the matrix

950 (right panel) in BMSCs transfected with different isoforms of *Taz* (N) or different  
951 isoforms of *Sp7* (O). (P) Representative images (left panel) and quantification of Oil  
952 Red O staining (right panel) in BMSCs transfected with different isoforms of *Taz* with  
953 10 days of adipogenic induction. (Q) Representative images of  $\beta$ -Gal staining (left  
954 panel) and quantification (right panel) of  $\beta$ -Gal positive cells in BMSCs transfected  
955 with different isoforms of *Sirt2*. (R) Western blot analysis of the expression of YBX1,  
956 FN1, TAZ, SIRT2, P16, PPARG $\gamma$ , SP7 and RUNX2 in BMSCs isolated from  
957 *YBX1<sup>Prx1-CKO</sup>* mice and *YBX1<sup>lox/lox</sup>* mice. Data shown as mean  $\pm$  SEM. #, no  
958 significant difference; \*,  $P < 0.05$ ; \*\*,  $P < 0.01$ ; \*\*\*,  $P < 0.001$ ; One-way ANOVA.

959 **Figure 6 Sciadopitysin bind to and inhibited ubiquitin degradation of YBX1.**

960 (A) The homology modeling structure of mouse YBX1 and 9 top-ranked candidates.  
961 (B) Cell proliferation rate was assessed by CCK8 assay with administration of  
962 different compounds. (C) qRT-PCR analysis of *Ybx1* expression in BMSCs with  
963 administration of different compounds. (D) Representative images of Alizarin Red  
964 staining (up panel), Oil Red O staining (middle panel, scale bar: 50  $\mu$ m.) and  $\beta$ -Gal  
965 staining (bottom panel, scale bar: 50  $\mu$ m.) in BMSCs treated with different  
966 compounds. (E-G) Quantification of calcium mineralization based on Alizarin Red  
967 staining (E), quantification of Oil Red O based on Oil Red O staining (F) and  
968 quantification of  $\beta$ -Gal positive cells based on  $\beta$ -Gal staining in BMSCs treated with  
969 different compounds (G). (H) The molecular structure of sciadopitysin and model of  
970 interaction between sciadopitysin and mouse YBX1. (I) Western blot analysis of  
971 TAZ, THBS1, FN1, SP7, YBX1 expression in BMSCs treated with different  
972 concentration of sciadopitysin. (J) Western blot analysis of YBX1 in sciadopitysin  
973 pre-treated BMSCs with treatment of cycloheximide CHX. (K) Western blot  
974 analysis of YBX1 related ubiquitination in sciadopitysin pre-treated BMSCs with

975 Mg132. (L) Co-IP of His-FBXO33 with HA-YBX1 and serious of mutant  
976 HA-YBX1 following transfection into BMSCs. (M) Co-IP of FBXO33 withYBX1  
977 with or without administration of sciadopitysin. (N) Western blot analysis of  
978 FBXO33 and YBX1 expression in BMSCs treated with different concentration of  
979 sciadopitysin. (O) Semi-quantitative PCR showed the isoforms of *Sirt2*, *Sp7* and *Taz*  
980 in cultured BMSCs isolated from 2-month-old or 24-month-old mice then treated with  
981 or without sciadopitysin. Data shown as mean  $\pm$  SEM. #, no significant difference; \*\*,  
982  $P < 0.01$ ; \*\*\*,  $P < 0.001$ ; One-way ANOVA.

983 **Figure 7 Sciadopitysin treatment alleviates aging-related bone loss in mice.**

984 (A) Schematic of the time of oral treatment of sciadopitysin in mice. (B and C)  
985 Representative  $\mu$ CT images (B) and quantitative analysis of trabecular bone  
986 microarchitecture (C) in distal femora of 15-month-old mice with administration of  
987 sciadopitysin or vehicle. (D) Representative images (left panel) and quantification  
988 (right panel) of osteocalcin positive cells in distal femora of 15-month-old mice with  
989 administration of sciadopitysin or vehicle. Number of  $Ocn^+$  cells per bone perimeter  
990 (N.  $Ocn^+/B.Pm$ ). Arrows point to osteocalcin positive cells. Scale bar: 150 $\mu$ m. (E)  
991 Representative images (left panel) of calcein double labeling of trabecular bone and  
992 quantification (right panel) of mineral apposition rates (MARs) of 15-month-old mice  
993 with administration of sciadopitysin or vehicle. Scale bar: 150 $\mu$ m. (F)  
994 Representative images (left panel) and quantification (right panel) of Trap positive  
995 cells in distal femora of 15-month-old mice with administration of sciadopitysin or  
996 vehicle. Number of  $Tarp^+$  cells per bone perimeter (N.  $Trap^+/B.Pm$ ). Scale bar: 300 $\mu$ m.  
997 (G) Representative images of HE staining in distal femora (left panel) and  
998 quantification of the number of adipocytes related to tissue area (right panel, N.  
999 adipocytes/T.Ar) in distal femora of 15-month-old mice with administration of



1000 sciadopitysin or vehicle. Scale bar: 300 $\mu$ m. (H) RNA binding protein YBX1  
1001 regulate cluster of genes including *Fnl1*, *Taz*, *Sirt2*, *Sp7* as a splicing factor in nucleus  
1002 and *Bgn*, *Colla2*, *Nrp2* and *Thbs1* as mRNA stabilized protein in cytoplasm, which  
1003 further stimulate osteogenic differentiation and restrain senescence of BMSCs. The  
1004 decreased expression level of YBX1 during aging contribute to the debility of BMSCs  
1005 including increased senescence and reduced osteogenesis. Sciadopitysin can delay the  
1006 ubiquitination degradation of YBX1 by preventing YBX1 from binding to ubiquitin  
1007 ligase FBXO33. (Model based on data from previous figures.) Data shown as mean  
1008  $\pm$  SEM. #, no significant difference; \*,  $P < 0.05$ ; \*\*,  $P < 0.01$ ; \*\*\*,  $P < 0.001$ ;  
1009 One-way ANOVA.

Figure 1

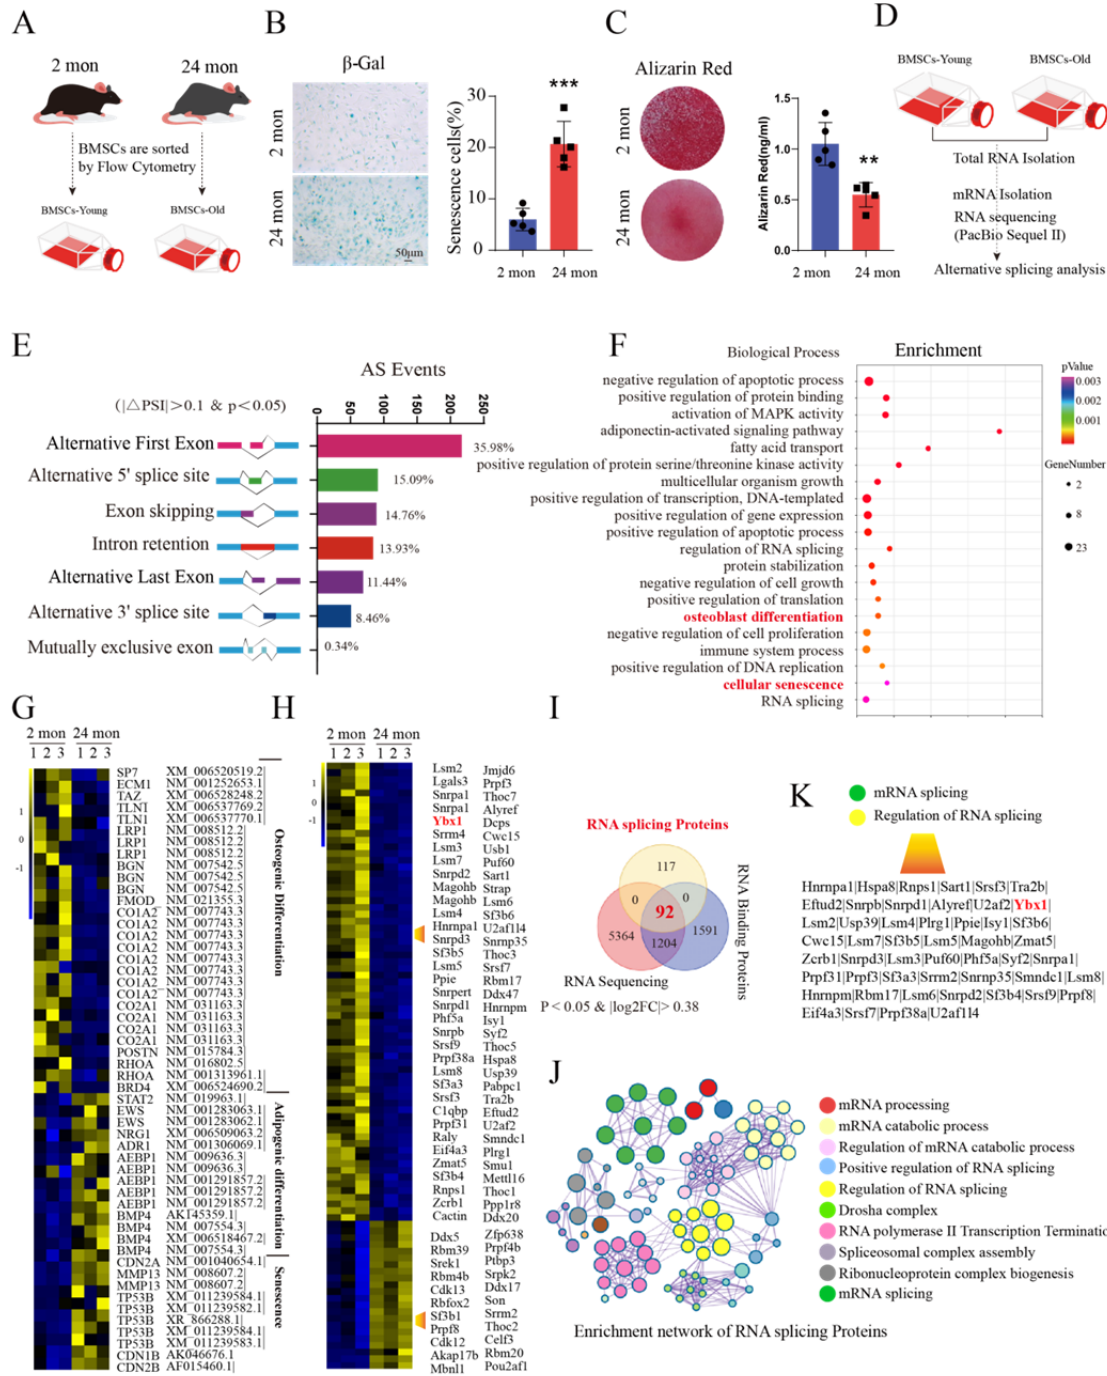

Figure 2

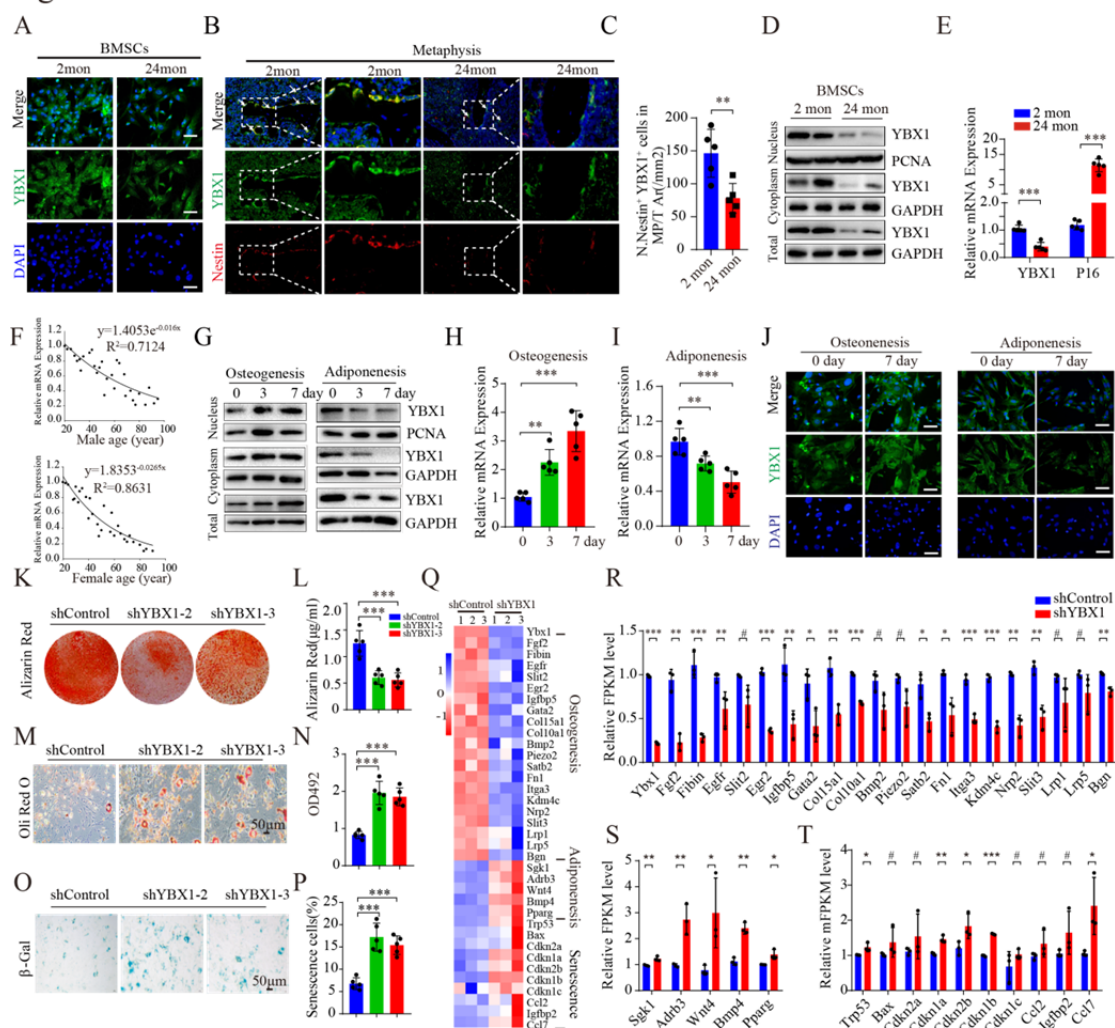

Figure 3

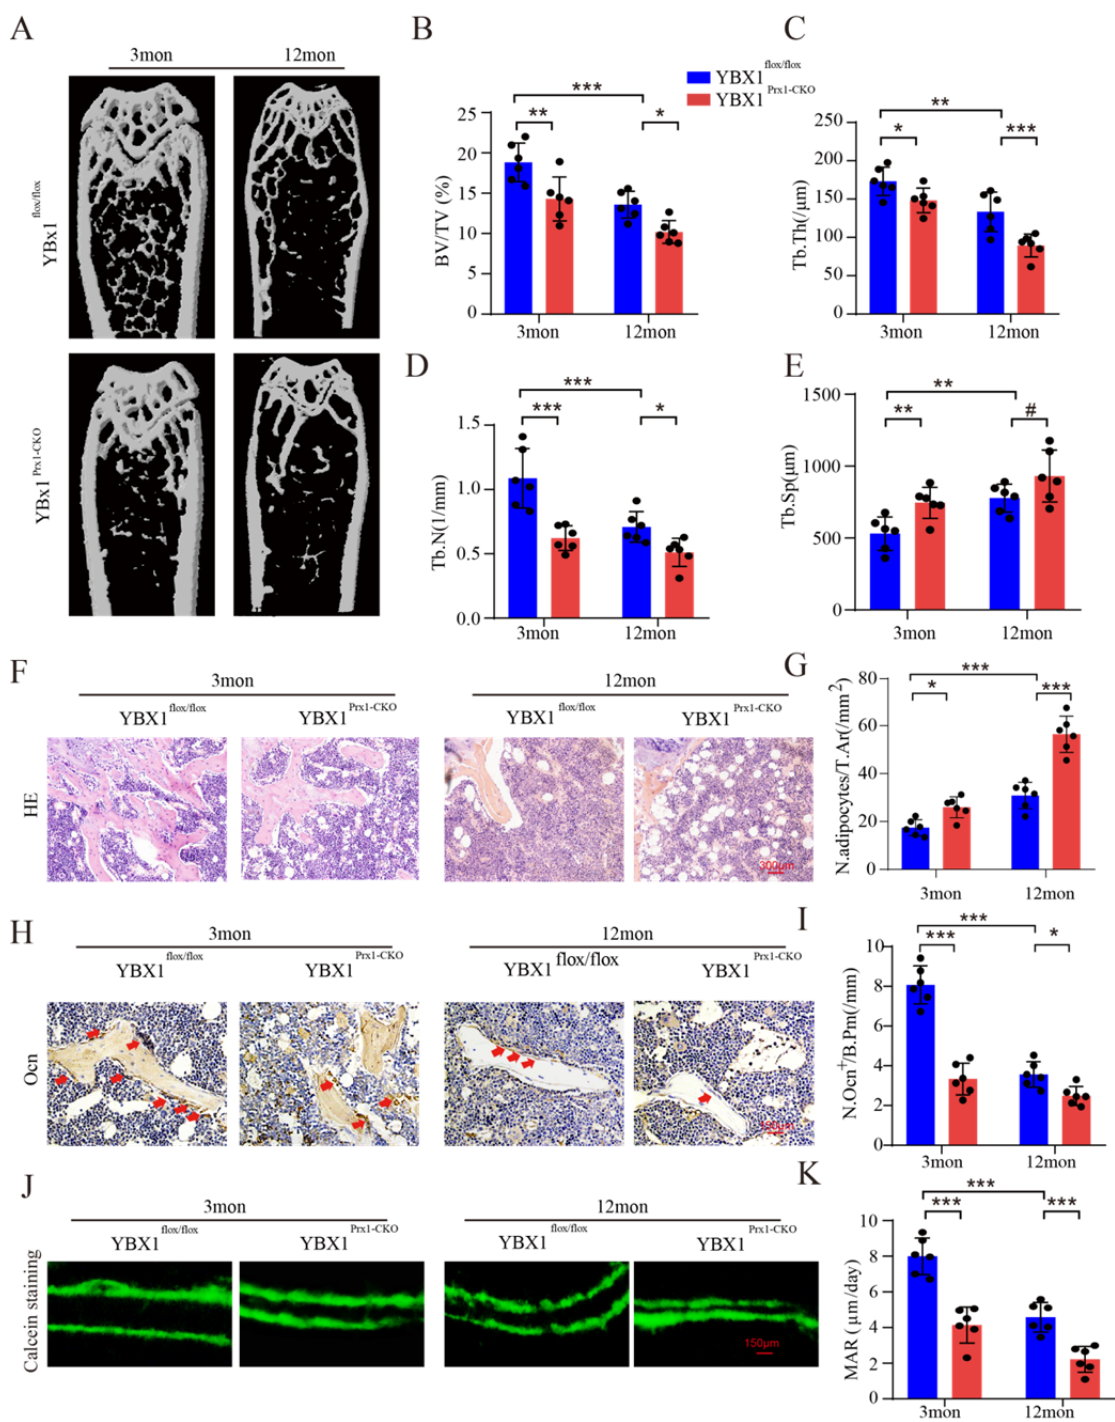

Figure 4

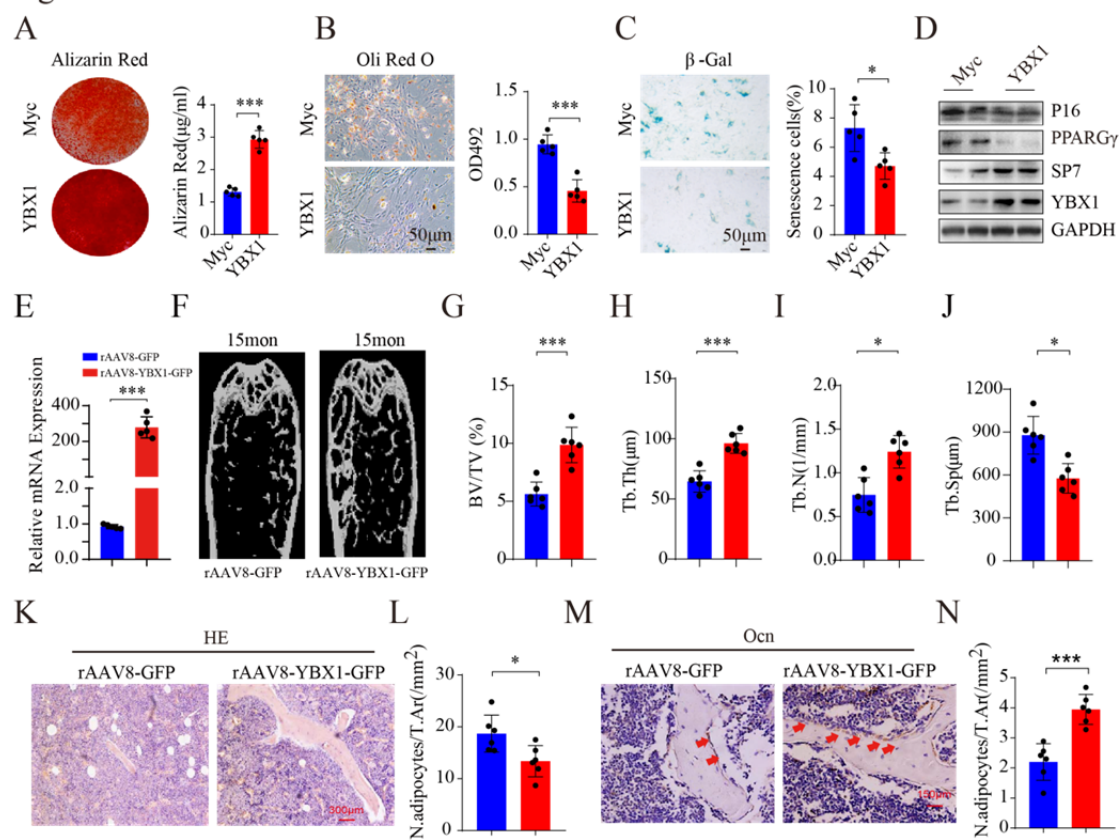

Figure 5

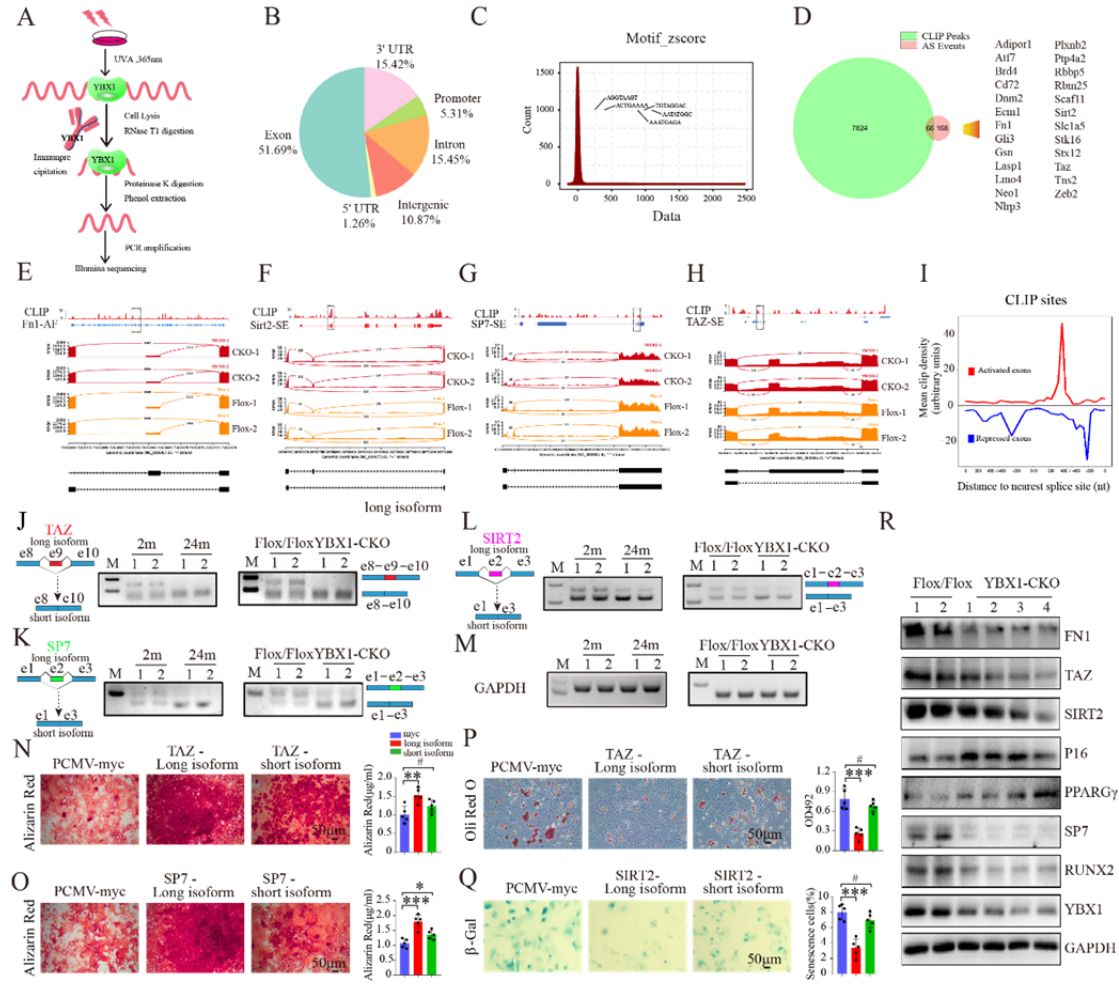

Figure 6

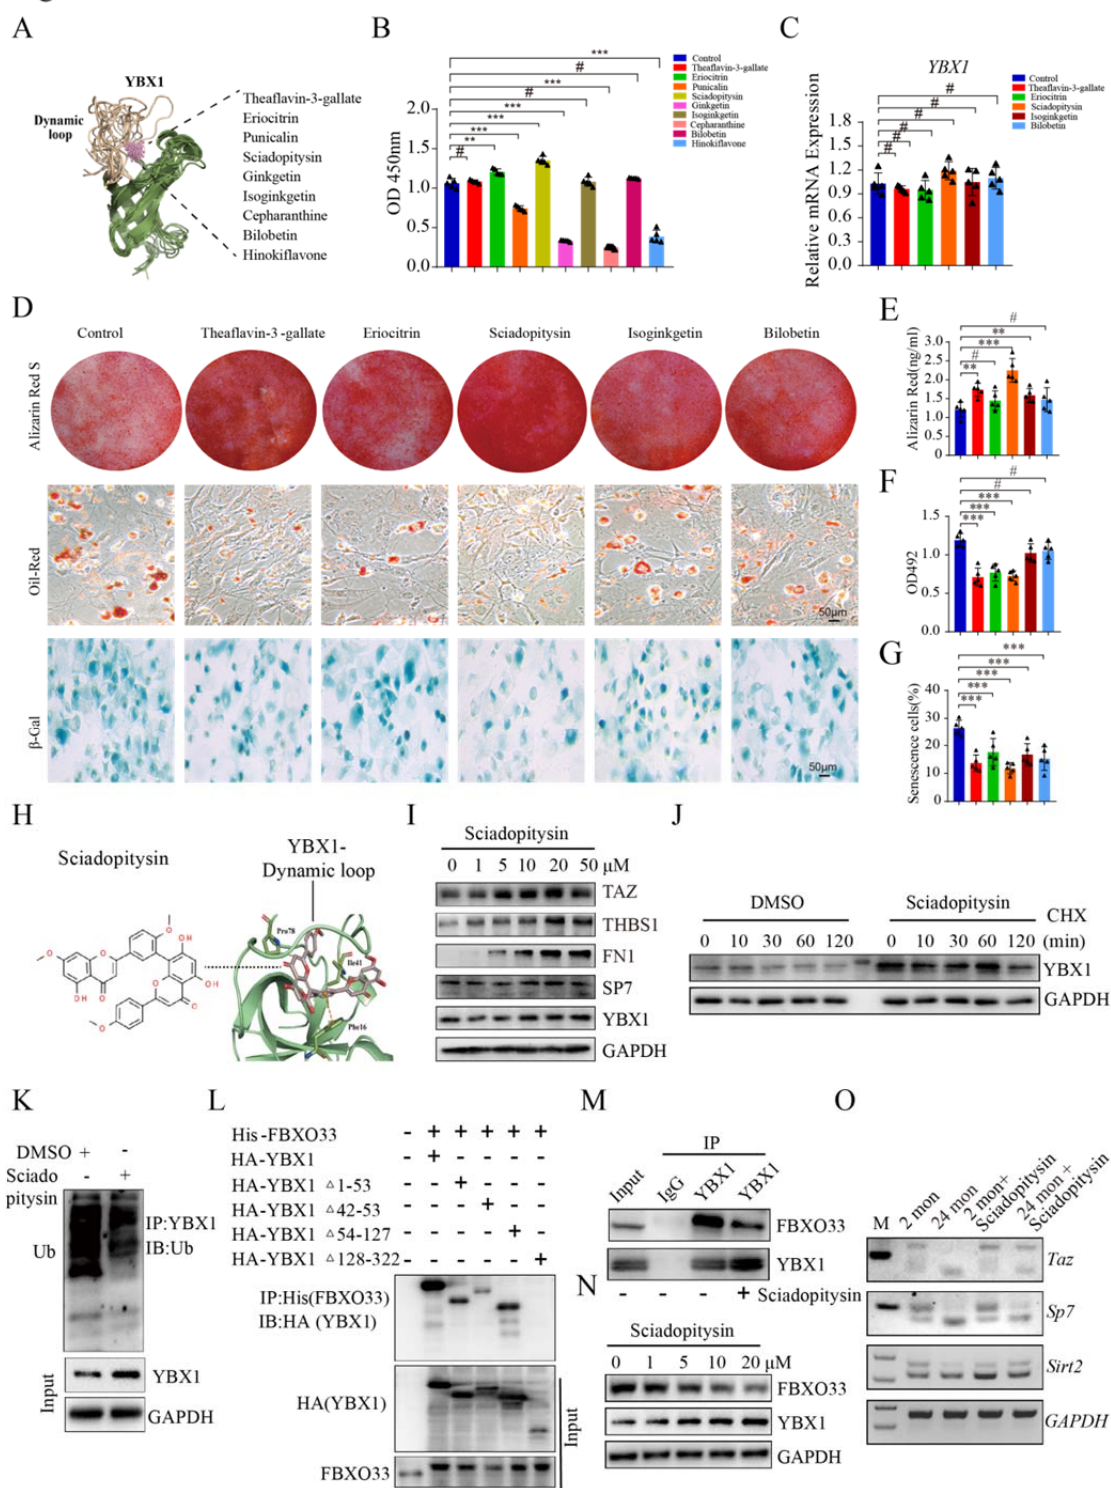

Figure 7

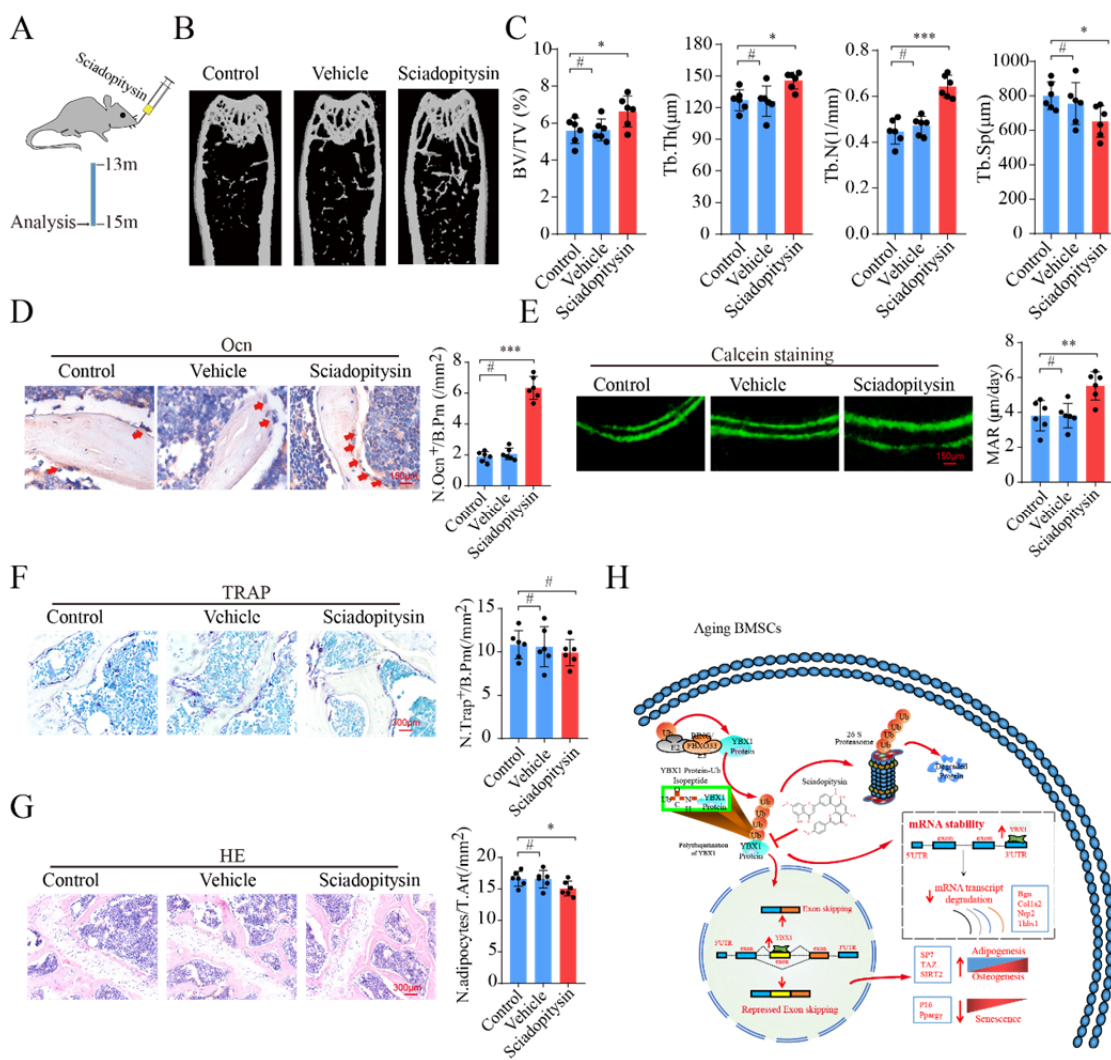

1016



1017 **Supplementary Materials: Including Figs. S1 to S5**  
 1018

Supplementary Figure 1

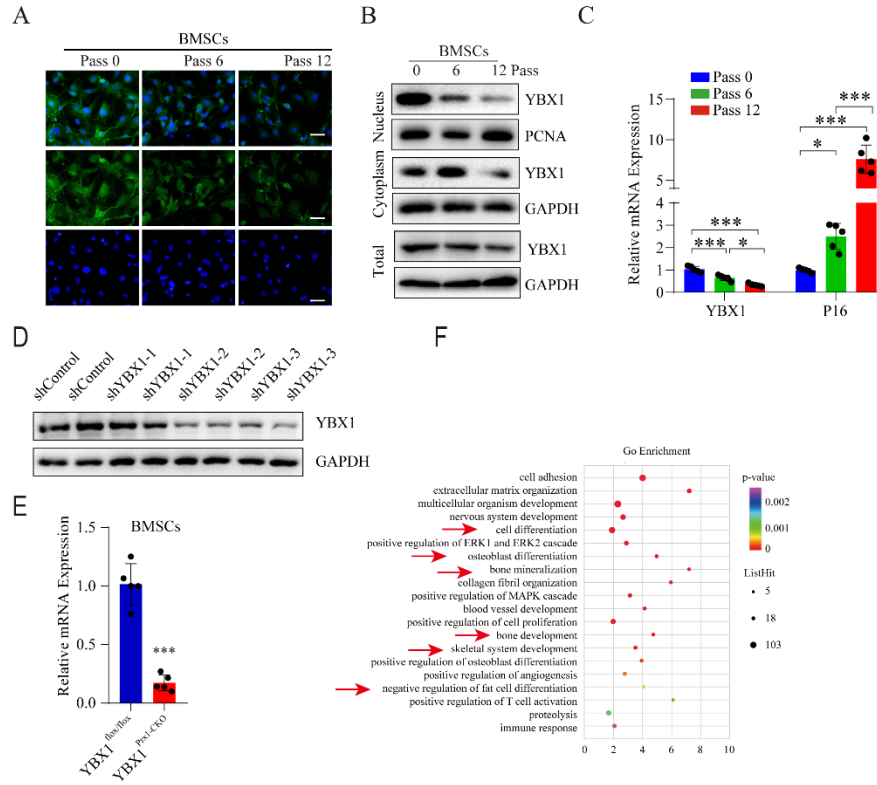

1019

Supplementary Figure 2

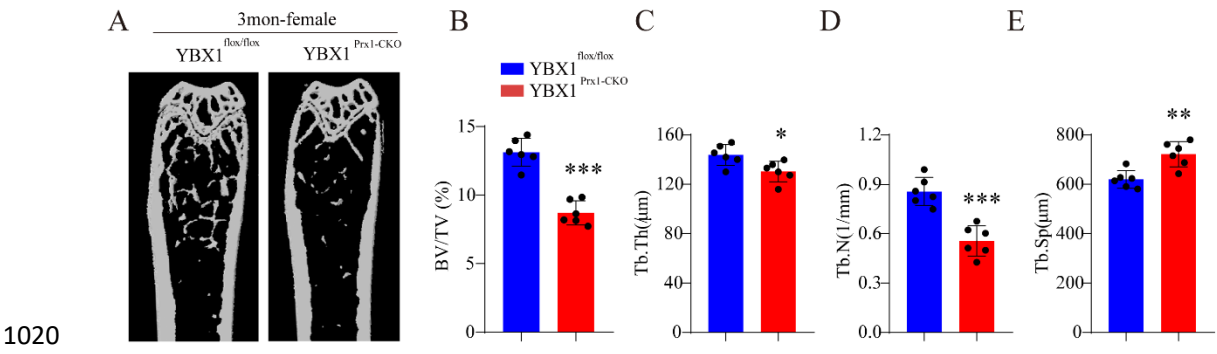

### Supplementary Figure 3

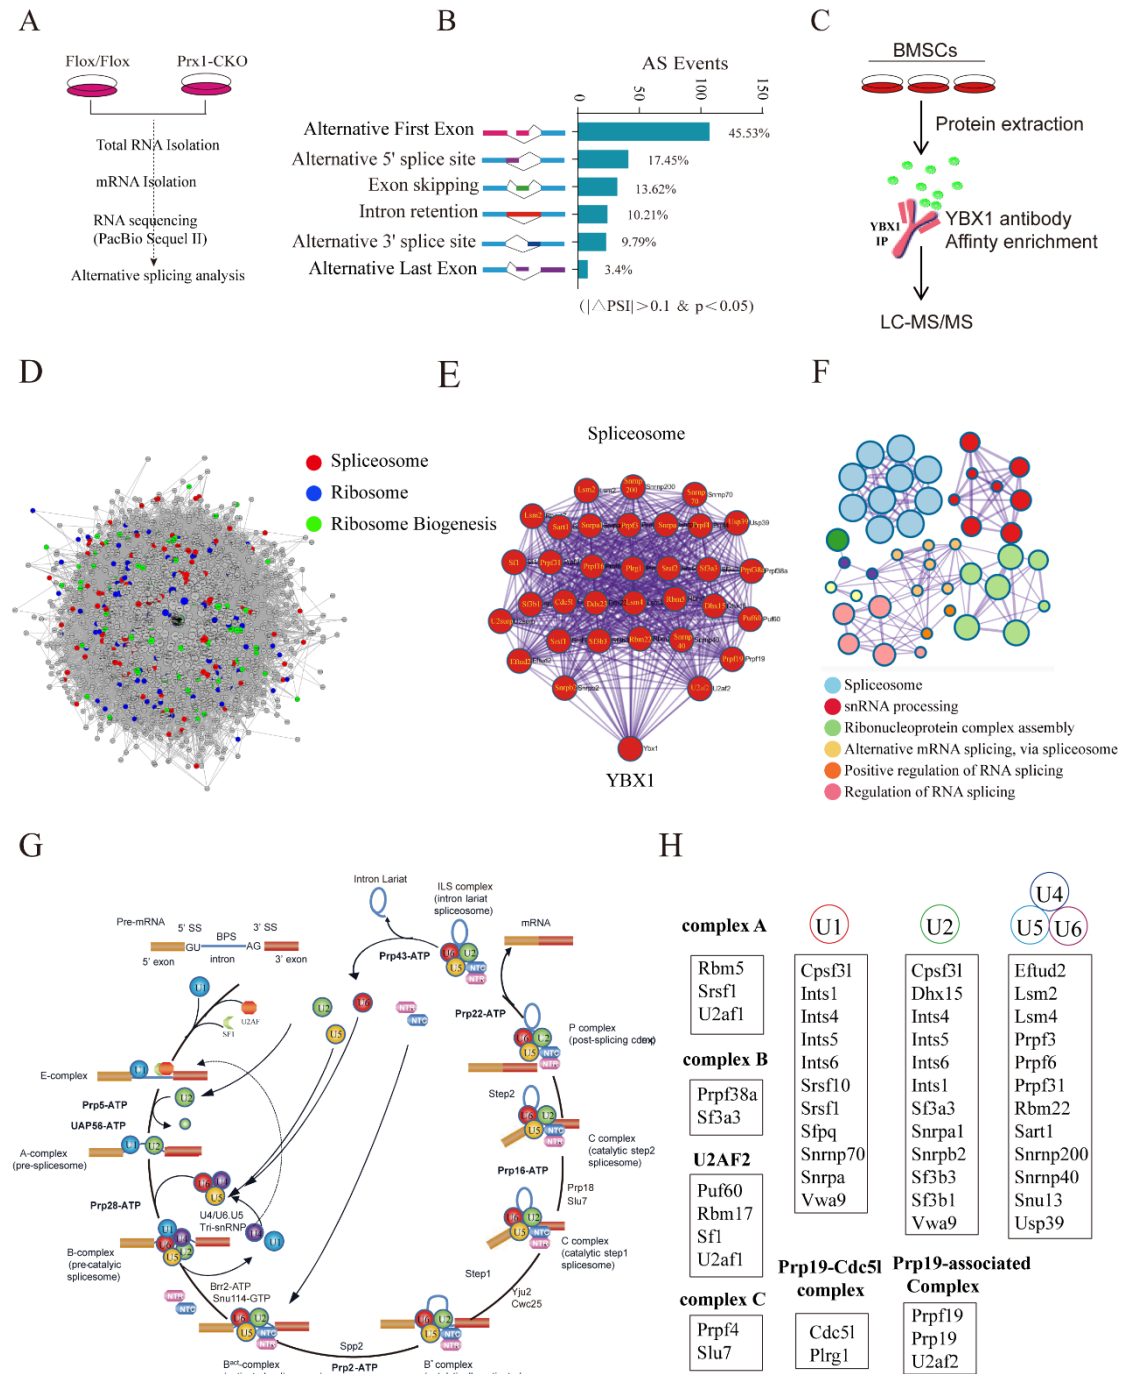

1021

## Supplementary Figure 4

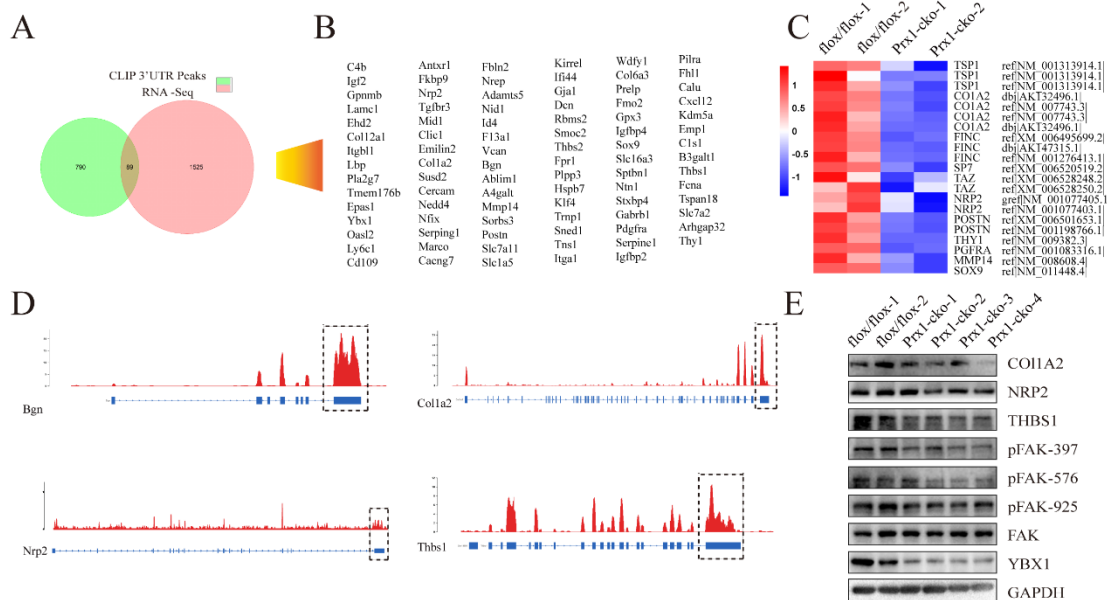

1022

## Supplementary Figure 5

A

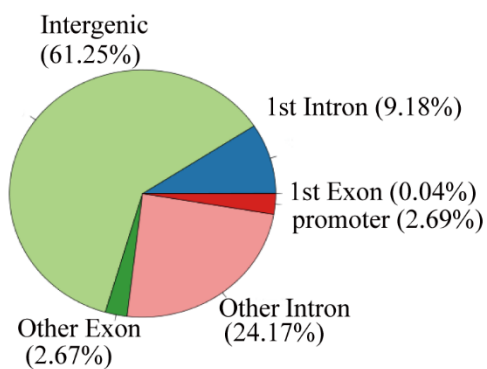

B

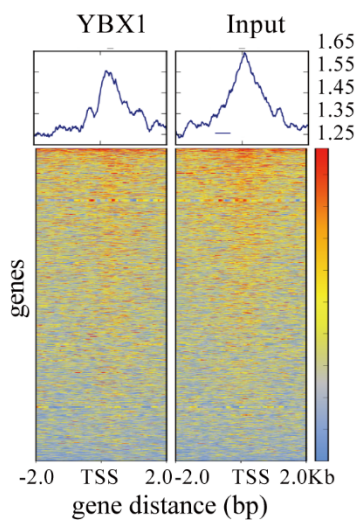

C

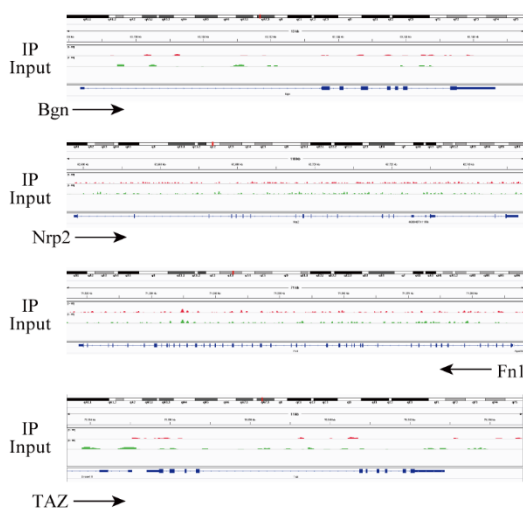

1023

D

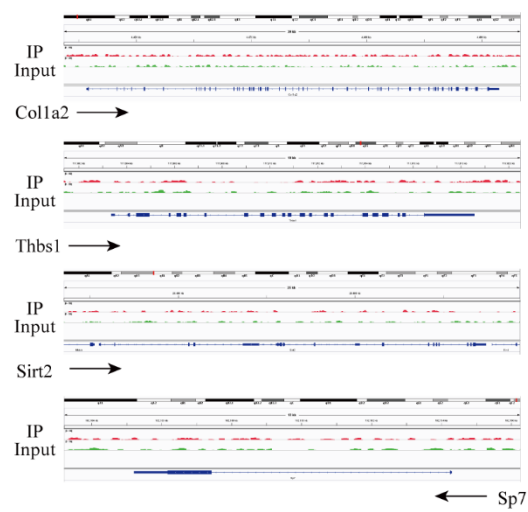

53

1024 **Supplementary figure 1 YBX1 level was lower in cultured primary BMSCs from**  
1025 **late passage**

1026 (A) Representative images of immunofluorescence staining of YBX1 (green) in  
1027 primary BMSCs isolated from passage 0, passage 6 and passage 12. Scale bar: 100 $\mu$ m.  
1028 (B) Western blot analysis of the expression of YBX1 in BMSCs from passage 0,  
1029 passage 6 and passage 12. (C) qRT-PCR analysis of the expression of *Ybx1* and *P16* in  
1030 BMSCs from passage 0, passage 6 and passage 12. (D) Western blot analysis of the  
1031 level of YBX1 in BMSCs transfected with adenovirus driven control and YBX1  
1032 shRNA. (E) qRT-PCR analysis of the levels of *Ybx1* in BMSCs isolated from  
1033 *YBX1<sup>Prx1-CKO</sup>* mice and *YBX1<sup>lox/lox</sup>* mice. (F) GO analysis of differentially expressed  
1034 genes in BMSCs isolated from *YBX1<sup>Prx1-CKO</sup>* mice and *YBX1<sup>lox/lox</sup>* mice. Data shown  
1035 as mean  $\pm$  SEM. \*,  $P < 0.05$ ; \*\*,  $P < 0.01$ ; \*\*\*,  $P < 0.001$ ; One-way ANOVA for C;  
1036 Student's t test for E.

1037

1038 **Supplementary figure 2 Depletion of YBX1 in BMSCs results in accelerated bone**  
1039 **loss in female mice**

1040 (A-E) Representative  $\mu$ CT images (A) and quantitative  $\mu$ CT analysis of trabecular  
1041 bone microarchitecture (B-E) in distal femora from 3-month-old female *YBX1<sup>Prx1-CKO</sup>*  
1042 mice and *YBX1<sup>lox/lox</sup>* mice. Data shown as mean  $\pm$  SEM. #, no significant difference; \*,  
1043  $P < 0.05$ ; \*\*,  $P < 0.01$ ; \*\*\*,  $P < 0.001$ ; Student's t test.

1044

1045 **Supplementary figure 3 YBX1 interacted with spliceosome components and**  
1046 **YBX1 deficiency altered pre-mRNA splicing in BMSCs**

1047 (A) Schematic diagram of experimental process of alternative splicing analysis. (B)  
1048 Histogram of the differentially spliced events between BMSCs isolated from

1049 *YBX1<sup>Prx1-CKO</sup>* mice and *YBX1<sup>flx/flx</sup>* mice. (C) Study design of mouse YBX1  
1050 interactomes. YBX1 interactomes are analyzed by LC-MS/MS. (D) The network  
1051 represents the proteins interacting with YBX1 in BMSCs. Specific color of the node  
1052 indicates spliceosomal, ribosomal and ribosomal biogenesis proteins. (E) Network  
1053 representation of YBX1 interacting spliceosomal proteins in BMSCs. (F)  
1054 Enrichment network representing the top 10 enriched terms of YBX1 related proteins.  
1055 Enriched terms with high similarity were clustered and rendered as a network, while  
1056 each node represents an enriched term and is colored according to its cluster. Node  
1057 size indicates the number of enriched proteins. (G) Spliceosome proteins interacting  
1058 with YBX1 participate in spliceosome assembly reaction in a stepwise manner to form  
1059 a mature mRNA. (H) Summarizing important YBX1 interacting spliceosomal proteins  
1060 based on their spliceosome complex.

1061

1062 **Supplementary figure 4 YBX1 alters mRNA stability by binding to 3'UTR.**

1063 (A) Venn diagrams of overlapping genes targeted by YBX1 on 3'UTR are and  
1064 showed altered expression upon YBX1 deletion. (B) Genes targeted by YBX1 on  
1065 3'UTR are and showed altered expression upon YBX1 deletion. (C) Heat map of  
1066 differentially expressed genes in BMSCs isolated from *YBX1<sup>Prx1-CKO</sup>* mice and  
1067 *YBX1<sup>flx/flx</sup>* mice. (D) RNA-seq read showed YBX1 binding the 3'UTR area of *Bgn*,  
1068 *Colla2*, *Nrp2* and *Thbs1* mRNA in BMSCs. (E) Western blot analysis of the  
1069 expression of YBX1, NRP2, THBS1, FAF and phosphorylation of FAK in BMSCs  
1070 isolated from *YBX1<sup>Prx1-CKO</sup>* mice and *YBX1<sup>flx/flx</sup>* mice.

1071

1072 **Supplementary figure 5 YBX1 do not bind to the promoter regions of *Bgn*, *Colla2*,**

1073 ***Nrp2*, *Thbs1*, *Fn1*, *Taz*, *Sirt2*, and *Sp7* in BMSCs.**

1074 (A) Distribution of YBX1 ChIP-seq peaks in the genome. (B) Heatmap of YBX1 and  
1075 input ChIP-seq peaks in BMSCs. The signal is displayed within 2 kb of  
1076 transcriptional start site. (C) ChIP-seq profile for YBX1 in BMSCs at *Bgn*, *Nrp2*, *Fnl*  
1077 and *Taz*. (D) ChIP-seq profile for YBX1 in BMSCs at *Colla2*, *Thbs1*, *Sirt2*, and *Sp7*.
